# Supplementary material for: N-Donor ligand activation of titanocene for the Biginelli reaction via the imine mechanism
Source: Royal Society of Chemistry journal article supplement (doi:10.1039/c8ra01208c), 2018-01-01

*Supporting Information*

Key Laboratory of Applied Surface and Colloid Chemistry (Ministry of Education), School of Chemistry and Chemical Engineering, Shaanxi Normal University, Xi'an 710062, P. R. China  
E-mail: zwgao@snnu.edu.cn; Fax: +86-029-81530821

Table of Context

|                                                                                                       |           |
|-------------------------------------------------------------------------------------------------------|-----------|
| <b>1. General Information .....</b>                                                                   | <b>2</b>  |
| <b>2. General Procedure for Synthesis of 3,4-dihydropyrimidin-2(1H)-ones .....</b>                    | <b>3</b>  |
| <b>3. Experimental and Characterization Data .....</b>                                                | <b>4</b>  |
| <b>4. <sup>1</sup>H and <sup>13</sup>C Spectra for 3,4-dihydropyrimidin-2(1H)-ones Products .....</b> | <b>9</b>  |
| <b>5. HR-ESI-MS studies for proposed mechanism .....</b>                                              | <b>27</b> |
| <b>6. <sup>13</sup>C NMR Spectra studies for proposed mechanism .....</b>                             | <b>28</b> |

## 1. General Information

Reagents were purchased from commercial sources and were used as received unless mentioned otherwise. Reactions were monitored by thin layer chromatography using silica gel.  $^1\text{H}$  and  $^{13}\text{C}$  NMR spectra were recorded on a Bruker EQUINX55 (400 MHz for  $^1\text{H}$ ; 101 MHz for  $^{13}\text{C}$ ) spectrometer by using DMSO- $d_6$  as a solvent. For  $^1\text{H}$  NMR, tetramethylsilane (TMS) served as internal standard ( $\delta = 0$ ) and  $^1\text{H}$  NMR chemical shifts are reported in ppm downfield of tetramethylsilane and referenced to residual solvent peak (DMSO- $d_6$  at 2.5 ppm and 3.33 ppm) unless otherwise noted. The data are reported as follows: chemical shift, integration, multiplicity (s = singlet, d = doublet, t = triplet, q = quartet and m = multiplet), and coupling constant in Hz. For  $^{13}\text{C}$  NMR, DMSO- $d_6$  was used as internal standard ( $\delta = 39.52$ ) and spectra were obtained with complete proton decoupling.

ESI-MS and ESI-MS/MS measurements were performed in the positive-ion mode ( $m/z$  50–2500 range) on an MAXIS instrument from Bruker. This instrument has a hybrid quadrupole/ion mobility/orthogonal acceleration time-of-flight (oa-TOF) geometry and was used in the TOF V+ mode. All samples were dissolved in methanol and were directly infused into the ESI source at a flow rate of 4.0L/min after 1 min at 180 °C. ESI source conditions were as follows: capillary voltage 4.0 kV, nebulizer 0.4 bar, scan begin 100 $m/z$ , scan end 1300 $m/z$ , collision cell RF 200.0 Vpp, end plate offset -500V.

## 2. General Procedure for Synthesis of 3,4-dihydropyrimidin-2(1H)-ones

A representative example for preparation of 4i is as following: a mixture of p-Bromo Benzaldehyde (185 g, 1 mmol), 1,3-dicarbonyl compound (128  $\mu$ L ,1 mmol), urea (0.120 g, 2 mmol), and  $\text{Cp}_2\text{TiCl}_2$  (0.0248 g, 10 mol % to all of the reactants) was charged into a 50 mL pressure flask with a magnetic stirring bar. EtOH (4 mL) was subsequent added by syringe. Then the reaction system was placed in an oil-bath (70 °C) with magnetic stirring. After completion of the reaction, as indicated by TLC analysis, the reaction mixture was carried out via Silica gel flask column chromatography (eluent: petroleum ether: EtOAc = 1:1) to give the desired product 4i 304.2 mg as white solid. Yield: 90%.

### 3. Experimental and Characterization Data

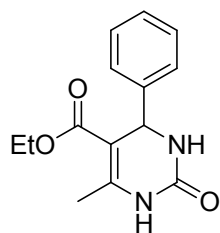

**5-Ethoxycarbonyl-6-methyl-4-phenyl-3,4-dihydropyrimidin-2(1H)-one(4a,93%)**

$^1\text{H}$  NMR (400 MHz, DMSO)  $\delta$  9.19 (s, 1H), 7.74 (s, 1H), 7.34 – 7.29 (m, 2H), 7.24 (d,  $J = 6.9$  Hz, 3H), 5.15 (d,  $J = 3.1$  Hz, 1H), 3.98 (q,  $J = 7.1$  Hz, 2H), 2.25 (s, 3H), 1.09 (t,  $J = 7.1$  Hz, 3H).  $^{13}\text{C}$  NMR (101 MHz, DMSO)  $\delta$  165.4, 152.3, 148.4, 144.9, 128.4, 127.3, 126.3, 99.4, 59.3, 54.1, 17.8, 14.1.

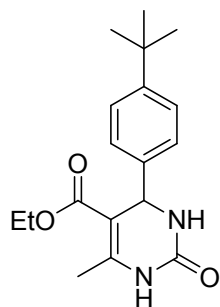

**4-(4-tert-butyl-5-ethoxycarbonyl-6-methyl-3,4-dihydropyrimidin-2(1H)-one(4b,88%)**

$^1\text{H}$  NMR (400 MHz, DMSO)  $\delta$  9.18 (s, 1H), 7.70 (s, 1H), 7.33 (d,  $J = 8.3$  Hz, 2H), 7.17 (d,  $J = 7.9$  Hz, 2H), 5.14 (d, 1H), 3.99 (q,  $J = 7.1$  Hz, 2H), 2.25 (s, 3H), 1.25 (s, 9H), 1.11 (t,  $J = 7.1$  Hz, 3H).  $^{13}\text{C}$  NMR (101 MHz, DMSO)  $\delta$  165.4, 152.4, 149.6, 148.2, 142.0, 125.9, 125.1, 99.5, 59.2, 53.5, 34.2, 31.1, 17.8, 14.1.

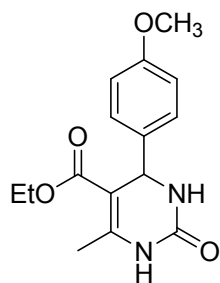

**5-Ethoxycarbonyl-4-(4-methoxyphenyl)-6-methyl-3,4-dihydropyrimidin-2(1H)-one(4c,90%)**

$^1\text{H}$  NMR (400 MHz, DMSO)  $\delta$  9.19 (s, 1H), 7.70 (s, 1H), 7.17 (d,  $J = 8.7$  Hz, 2H), 6.88 (d,  $J = 8.7$  Hz, 2H), 5.13 (d,  $J = 3.2$  Hz, 1H), 3.98 (q,  $J = 7.1$  Hz, 2H), 3.71 (s, 3H), 2.26 (s, 3H), 1.10 (t,  $J = 7.1$  Hz, 3H).  $^{13}\text{C}$  NMR (101 MHz, DMSO)  $\delta$  165.5, 158.6, 152.4, 148.1, 137.1, 127.5, 113.8, 99.7, 59.2, 55.1, 53.5, 17.8, 14.1.

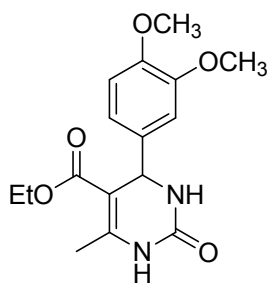

**4-(3,4-dimethoxyphenyl)-5-ethoxycarbonyl-6-methyl-3,4-dihydropyrimidin-2(1H)-one(4d,86%)**

$^1\text{H}$  NMR (400 MHz, DMSO)  $\delta$  9.18 (s, 1H), 7.70 (s, 1H), 6.91 – 6.85 (m, 2H), 6.75 (d,  $J = 9.6$  Hz, 1H), 5.13 (d,  $J = 3.0$  Hz, 1H), 4.01 (q,  $J = 7.0$  Hz, 2H), 3.72 (d,  $J = 3.4$  Hz, 6H), 2.27 (s, 3H), 1.12 (t,  $J = 7.1$  Hz, 3H).  $^{13}\text{C}$  NMR (101 MHz, DMSO)  $\delta$  165.5, 152.4, 148.6, 148.2 (d,  $J = 4.9$  Hz), 137.4, 118.0, 111.8, 110.6, 99.5, 59.3, 55.5 (d,  $J = 10.0$  Hz), 53.6, 17.8, 14.2.

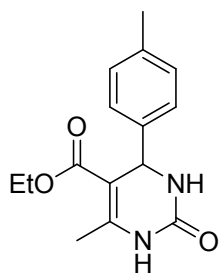

**5-Ethoxycarbonyl-4-(4-methylphenyl)-6-methyl-3,4-dihydropyrimidin-2(1H)-one(4e,82%)**

$^1\text{H}$  NMR (400 MHz, DMSO)  $\delta$  9.16 (s, 1H), 7.69 (s, 1H), 7.12 (s, 4H), 5.12 (d,  $J$  = 3.2 Hz, 1H), 3.98 (q,  $J$  = 7.0 Hz, 2H), 2.25 (d,  $J$  = 5.7 Hz, 6H), 1.10 (t,  $J$  = 7.1 Hz, 3H).  $^{13}\text{C}$  NMR (101 MHz, DMSO)  $\delta$  165.4, 152.2, 148.2,

142.0, 136.4, 128.9, 126.2, 99.4, 59.2, 53.7, 20.7, 17.8, 14.1.

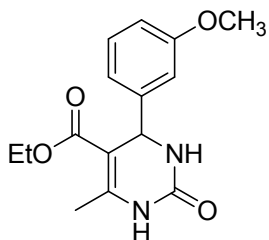

**5-Ethoxycarbonyl-4-(3-methoxyphenyl)-6-methyl-3,4-dihydropyrimidin-2(1H)-one(4f,67%)**

$^1\text{H}$  NMR (400 MHz, DMSO)  $\delta$  9.21 (s, 1H), 7.75 (s, 1H), 7.24 (t,  $J$  = 7.7 Hz, 1H), 6.86 – 6.78 (m, 3H), 5.15 (d,  $J$  = 2.5 Hz, 1H), 4.00 (q,  $J$  = 7.0 Hz, 2H), 3.72 (s, 3H), 2.26 (s, 3H), 1.11 (t,  $J$  = 7.0 Hz, 3H).  $^{13}\text{C}$  NMR (101 MHz, DMSO)  $\delta$

165.4, 159.3, 152.4, 148.5, 146.4, 129.6, 118.3, 112.5, 112.2, 99.3, 59.3, 55.0, 53.9, 17.8, 14.2.

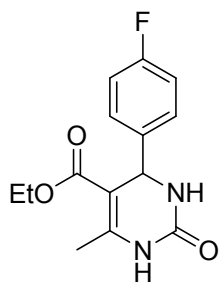

**4-(4-Fluorophenyl)-5-ethoxycarbonyl-6-methyl-3,4-dihydropyrimidin-2(1H)-one(4g,87%)**

$^1\text{H}$  NMR (400 MHz, DMSO)  $\delta$  9.23 (s, 1H), 7.75 (s, 1H), 7.30 – 7.23 (m, 2H), 7.18 – 7.11 (m, 2H), 5.16 (d,  $J$  = 3.2 Hz, 1H), 4.03 – 3.93 (m, 2H), 2.26 (s, 3H), 1.09 (t,  $J$  = 7.1 Hz, 3H).  $^{13}\text{C}$  NMR (101 MHz, DMSO)  $\delta$  165.3,

162.6, 160.2, 152.1 (d,  $J$  = 9.3 Hz), 148.5 (d,  $J$  = 3.9 Hz), 141.2 (d,  $J$  = 3.0 Hz), 128.3 (d,  $J$  = 8.2 Hz), 115.1 (d,  $J$  = 21.1 Hz), 115.0 – 114.7 (m), 99.2 (d,  $J$  = 4.3 Hz), 59.2, 53.4, 17.8, 14.0.

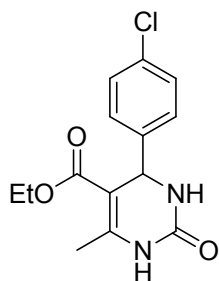

**4-(4-Chlorophenyl)-5-ethoxycarbonyl-6-methyl-3,4-dihydropyrimidin-2(1H)-one(4h,81%)**

$^1\text{H}$  NMR (400 MHz, DMSO)  $\delta$  9.29 (s, 1H), 7.81 (s, 1H), 7.37 (d,  $J$  = 8.3 Hz, 2H), 7.28 (d,  $J$  = 8.3 Hz, 2H), 5.19 (d,  $J$  = 2.4 Hz, 1H), 3.98 (dd,  $J$  = 12.4, 6.5 Hz, 2H), 2.28 (s, 3H), 1.08 (t,  $J$  = 7.0 Hz, 3H).  $^{13}\text{C}$  NMR (101 MHz,

DMSO)  $\delta$  165.3, 152.2, 148.8, 143.9, 132.0, 128.4 (d,  $J$  = 14.7 Hz), 99.0, 59.4, 53.6, 17.9, 14.1.

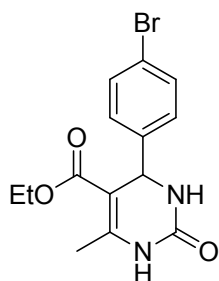

**4-(4-Bromophenyl)-5-ethoxycarbonyl-6-methyl-3,4-dihydropyrimidin-2(1H)-one(4i,90%)**

$^1\text{H}$  NMR (400 MHz, DMSO)  $\delta$  9.30 (s, 1H), 7.81 (s, 1H), 7.51 (d,  $J$  = 8.0 Hz, 2H), 7.23 (d,  $J$  = 8.2 Hz, 2H), 5.17 (d,  $J$  = 12.4 Hz, 1H), 3.98 (dd,  $J$  = 13.2, 6.4 Hz, 2H), 2.28 (s, 3H), 1.08 (t,  $J$  = 6.9 Hz, 3H).  $^{13}\text{C}$  NMR (101 MHz, DMSO)  $\delta$  165.3, 152.2, 148.8, 144.3, 131.4, 128.7, 120.5, 99.0, 59.4, 53.7, 17.9, 14.1.

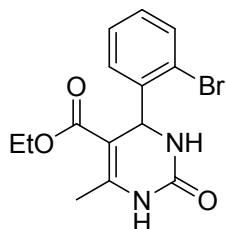

**4-(2-Bromophenyl)-5-ethoxycarbonyl-6-methyl-3,4-dihydropyrimidin-2(1H)-one(4j,67%)**

$^1\text{H}$  NMR (400 MHz, DMSO)  $\delta$  9.32 (s, 1H), 7.74 (s, 1H), 7.32 (dt,  $J$  = 28.2, 8.3 Hz, 4H), 5.67 (d, 1H), 3.90 (q,  $J$  = 7.1 Hz, 2H), 2.32 (s, 3H), 0.99 (t,  $J$  = 7.1 Hz, 3H).  $^{13}\text{C}$  NMR (101 MHz, DMSO)  $\delta$  165.0, 151.6, 149.3, 141.8, 131.8, 129.4, 129.1, 128.9, 127.8, 98.0, 59.2, 51.6, 17.7, 13.9.

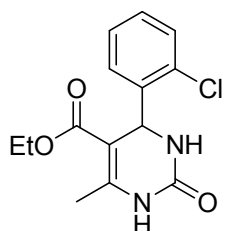

**4-(2-Chlorophenyl)-5-ethoxycarbonyl-6-methyl-3,4-dihydropyrimidin-2(1H)-one(4k,75%)**

$^1\text{H}$  NMR (400 MHz, DMSO)  $\delta$  9.33 (s, 1H), 7.72 (s, 1H), 7.56 (d,  $J$  = 7.9 Hz, 1H), 7.33 (s, 2H), 7.17 (s, 1H), 5.65 (d,  $J$  = 2.0 Hz, 1H), 3.90 (q,  $J$  = 7.0 Hz, 2H), 2.33 (s, 3H), 0.99 (t,  $J$  = 7.1 Hz, 3H).  $^{13}\text{C}$  NMR (101 MHz, DMSO)  $\delta$  165.0, 151.5, 149.3, 143.4, 132.7, 129.4, 128.8, 128.5, 122.4, 98.5, 59.1, 54.1, 17.7, 14.0.

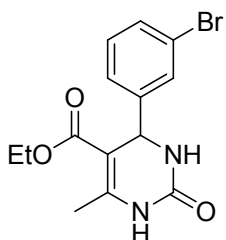

**4-(3-Bromophenyl)-5-ethoxycarbonyl-6-methyl-3,4-dihydropyrimidin-2(1H)-one(4l,78%)**

$^1\text{H}$  NMR (400 MHz, DMSO)  $\delta$  9.29 (s, 1H), 7.81 (s, 1H), 7.47 – 7.39 (m, 2H), 7.28 (q,  $J$  = 7.7 Hz, 2H), 5.18 (d,  $J$  = 2.9 Hz, 1H), 4.01 (dd,  $J$  = 14.9, 7.3 Hz, 2H), 2.28 (s, 3H), 1.10 (t,  $J$  = 7.1 Hz, 3H).  $^{13}\text{C}$  NMR (101 MHz, DMSO)  $\delta$  165.2, 152.0, 149.0, 147.6, 130.8, 130.2, 129.3, 125.3, 121.6, 98.7, 59.4, 53.7, 17.9, 14.1.

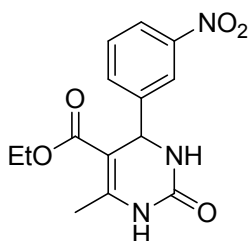

**5-Ethoxycarbonyl-6-methyl-4-(3-nitrophenyl)-3,4-dihydropyrimidin-2(1H)-one(4m,67%)**

$^1\text{H}$  NMR (400 MHz, DMSO)  $\delta$  9.38 (s, 1H), 8.11 (s, 2H), 7.91 (s, 1H), 7.67 (dt,  $J$  = 15.5, 7.7 Hz, 2H), 5.33 (d,  $J$  = 3.1 Hz, 1H), 3.98 (dd,  $J$  =

13.5, 6.7 Hz, 2H), 3.40 (s, 1H), 2.28 (s, 3H), 1.09 (t,  $J = 7.1$  Hz, 3H).  $^{13}\text{C}$  NMR (101 MHz, DMSO)  $\delta$  165.1, 152.0, 149.4, 147.8, 147.1, 133.1, 130.2, 122.4, 121.1, 98.5, 59.5, 53.7, 17.9, 14.0.

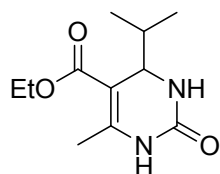

**5-Ethoxycarbonyl-6-methyl-4-isopropyl-3,4-dihydropyrimidin-2(1H)-one(4n,12%)**

$^1\text{H}$  NMR (400 MHz, DMSO)  $\delta$  8.89 (s, 1H), 7.28 (s, 1H), 4.11 – 4.01 (m, 2H), 3.95 (t,  $J = 3.4$  Hz, 1H), 2.17 (s, 3H), 1.18 (t,  $J = 7.1$  Hz, 4H), 0.82 (d,  $J = 6.9$  Hz, 3H), 0.74 (d,  $J = 6.8$  Hz, 3H).  $^{13}\text{C}$  NMR (101 MHz, DMSO)  $\delta$  165.8, 153.2, 148.5, 98.2, 59.1, 55.5, 34.6, 18.5, 17.7, 16.0, 14.2.

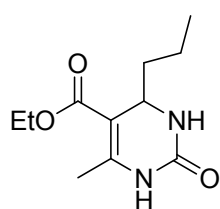

**5-Ethoxycarbonyl-6-methyl-4-propyl-3,4-dihydropyrimidin-2(1H)-one(4o,50%)**

$^1\text{H}$  NMR (400 MHz, DMSO)  $\delta$  8.93 (s, 1H), 7.32 (s, 1H), 4.10 – 4.01 (m, 3H), 2.16 (s, 3H), 1.43 – 1.30 (m, 3H), 1.18 (t,  $J = 7.1$  Hz, 4H), 0.85 (t,  $J = 6.9$  Hz, 3H).  $^{13}\text{C}$  NMR (101 MHz, DMSO)  $\delta$  165.5, 152.9, 148.3, 99.5, 59.1, 49.8, 39.1, 17.7, 17.0, 14.2, 13.7.

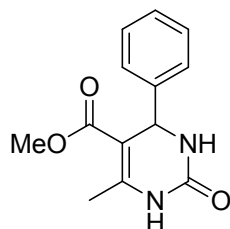

**5-Methoxycarbonyl-6-methyl-4-phenyl-3,4-dihydropyrimidin-2(1H)-one(4p,77%)**

$^1\text{H}$  NMR (400 MHz, DMSO)  $\delta$  9.25 (s, 1H), 7.78 (s, 1H), 7.36 – 7.29 (m, 2H), 7.28 – 7.21 (m, 3H), 5.18 (d,  $J = 3.1$  Hz, 1H), 3.54 (s, 3H), 2.27 (s, 3H).  $^{13}\text{C}$  NMR (101 MHz, DMSO)  $\delta$  165.9, 152.3, 148.7, 144.7, 128.5, 127.3, 126.2, 99.1, 53.9, 50.8, 17.9.

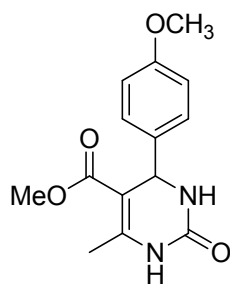

**5-Methoxycarbonyl-4-(4-methoxyphenyl)-6-methyl-3,4-dihydropyrimidin-2(1H)-one(4q,90%)**

$^1\text{H}$  NMR (400 MHz, DMSO)  $\delta$  9.21 (s, 1H), 7.71 (s, 1H), 7.17 (d,  $J = 8.6$  Hz, 2H), 6.88 (d,  $J = 8.6$  Hz, 2H), 5.12 (d,  $J = 3.1$  Hz, 1H), 3.72 (s, 3H), 3.53 (s, 3H), 2.27 (s, 3H).  $^{13}\text{C}$  NMR (101 MHz, DMSO)  $\delta$  165.9, 158.5, 152.3, 148.4, 136.9, 127.4, 113.8, 99.4, 55.1, 53.3, 50.8, 17.9.

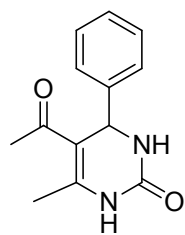

**5,6-Dimethyl-4-phenyl-3,4-dihydropyrimidin-2(1H)-one(4r,34%)**

$^1\text{H}$  NMR (400 MHz, DMSO)  $\delta$  9.20 (s, 1H), 7.85 (s, 1H), 7.35 – 7.31 (m, 2H),

7.26 (d,  $J$  = 4.8 Hz, 3H), 5.28 (d,  $J$  = 3.3 Hz, 1H), 2.30 (s, 3H), 2.11 (s, 3H).  $^{13}\text{C}$

NMR (101 MHz, DMSO)  $\delta$  194.7, 152.6, 148.5, 144.7, 128.9, 127.8, 126.8,

110.0, 54.3, 30.7, 19.3.



#### 4. <sup>1</sup>H and <sup>13</sup>C Spectra for 3,4-dihydropyrimidin-2(1H)-ones Products

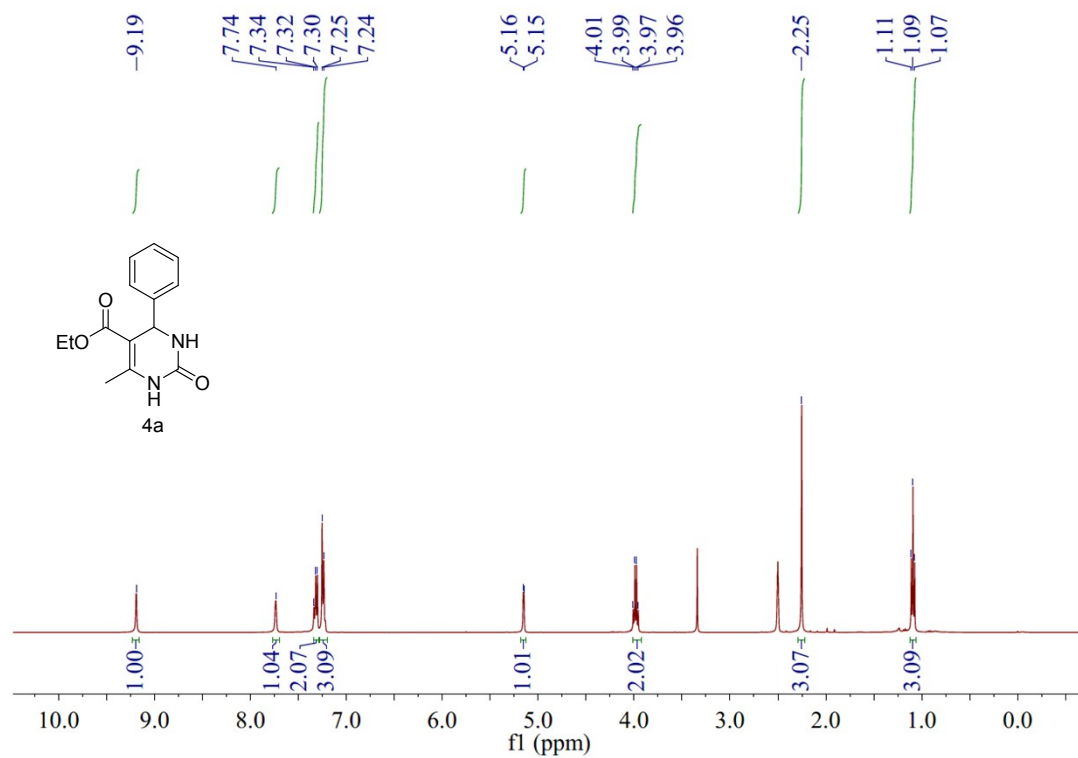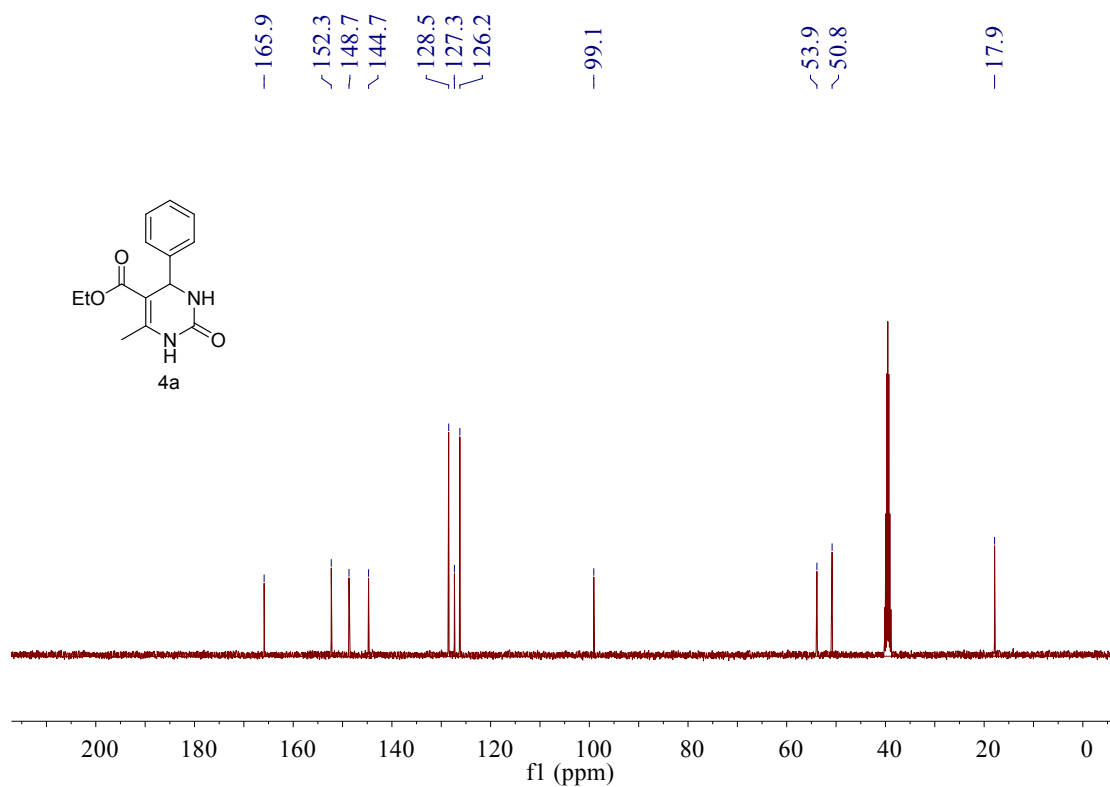

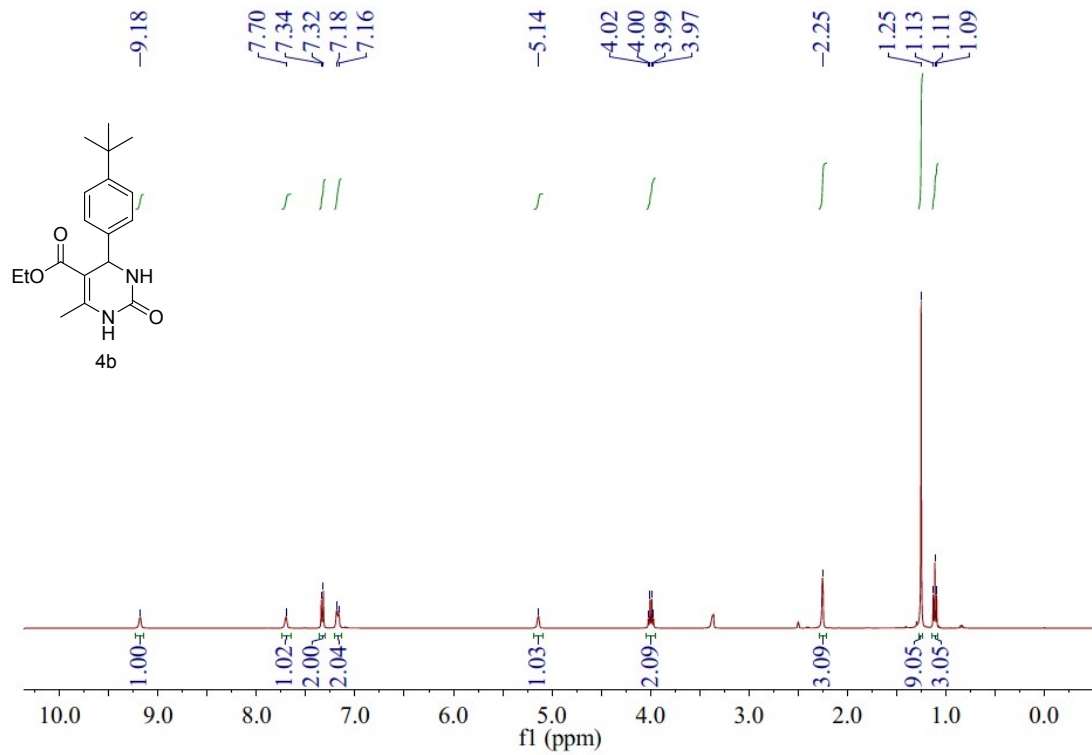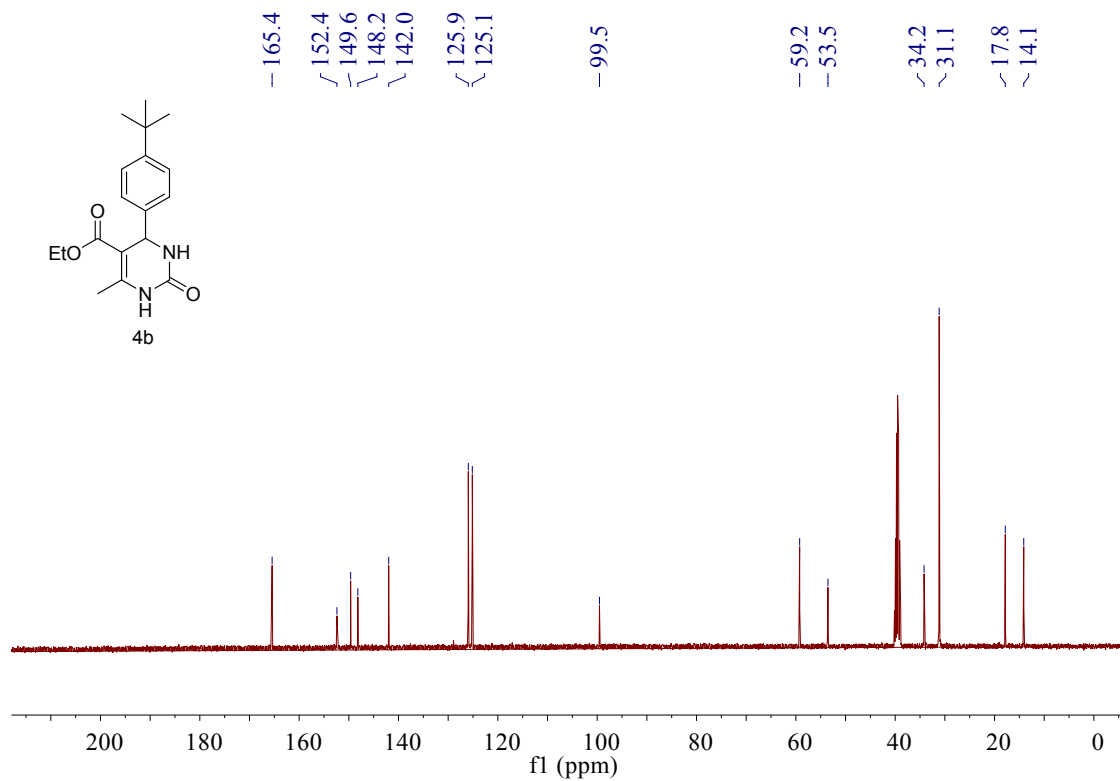

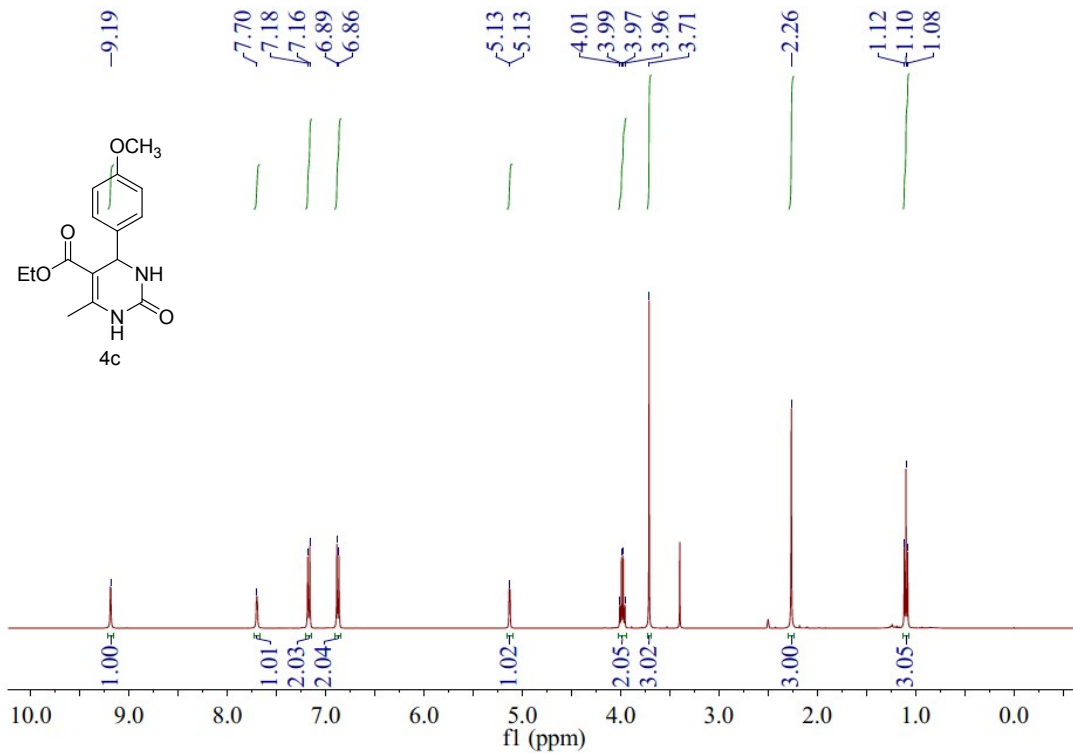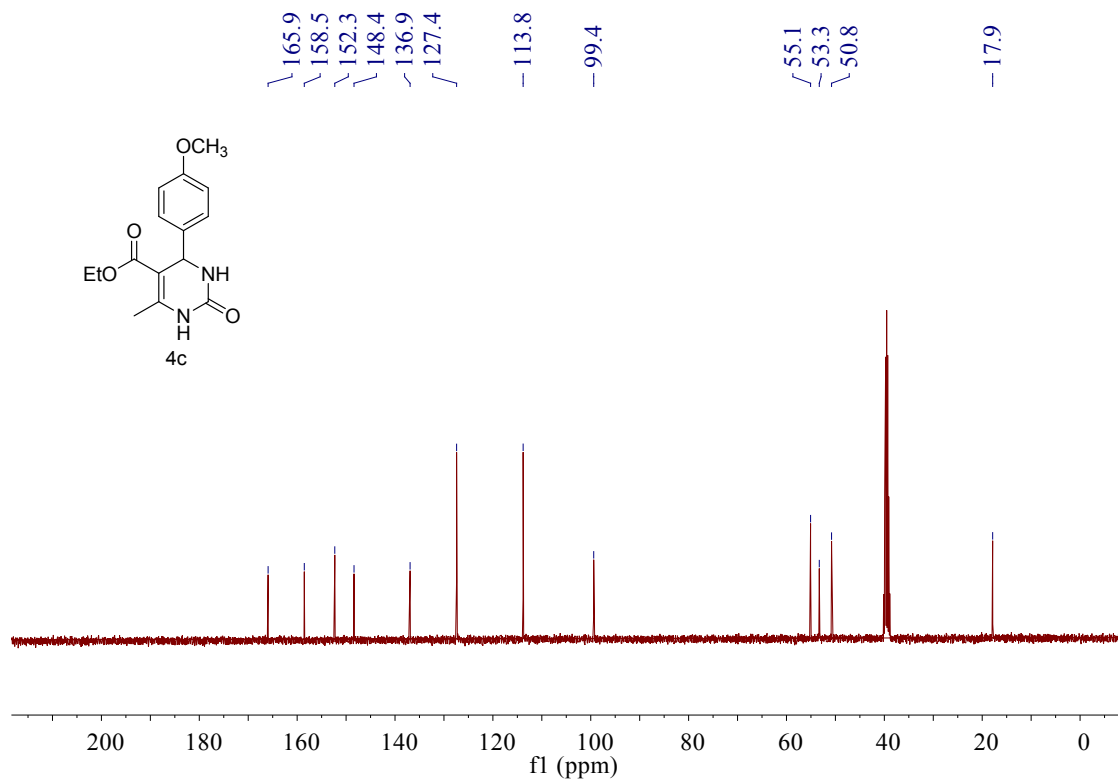

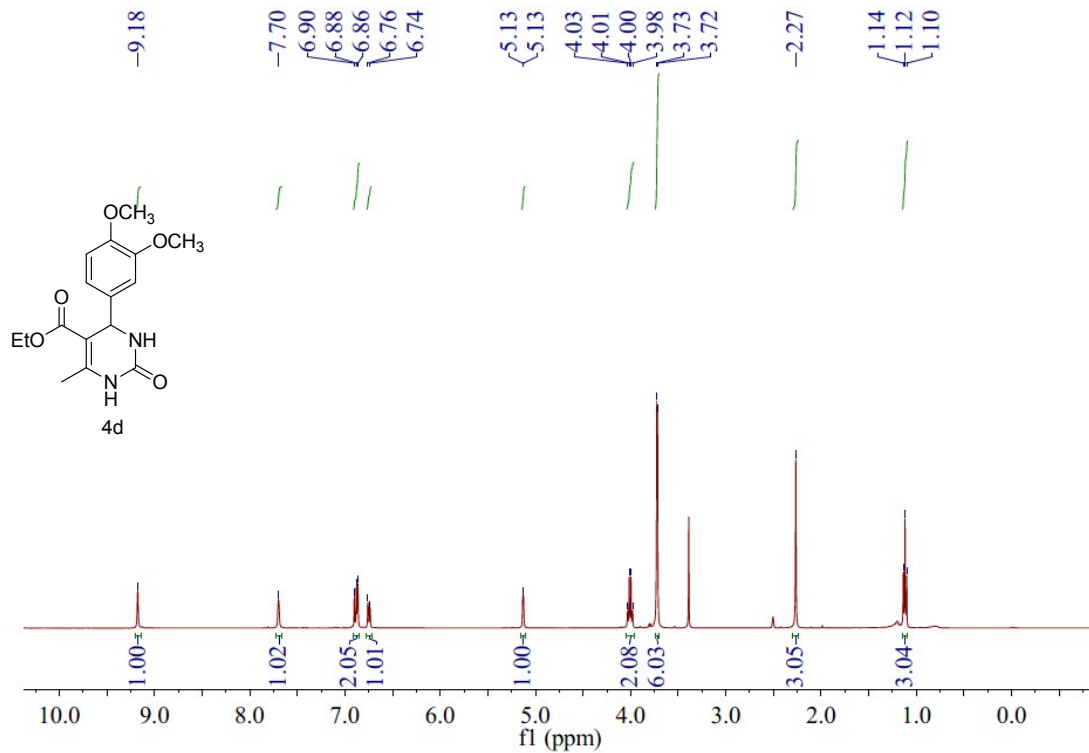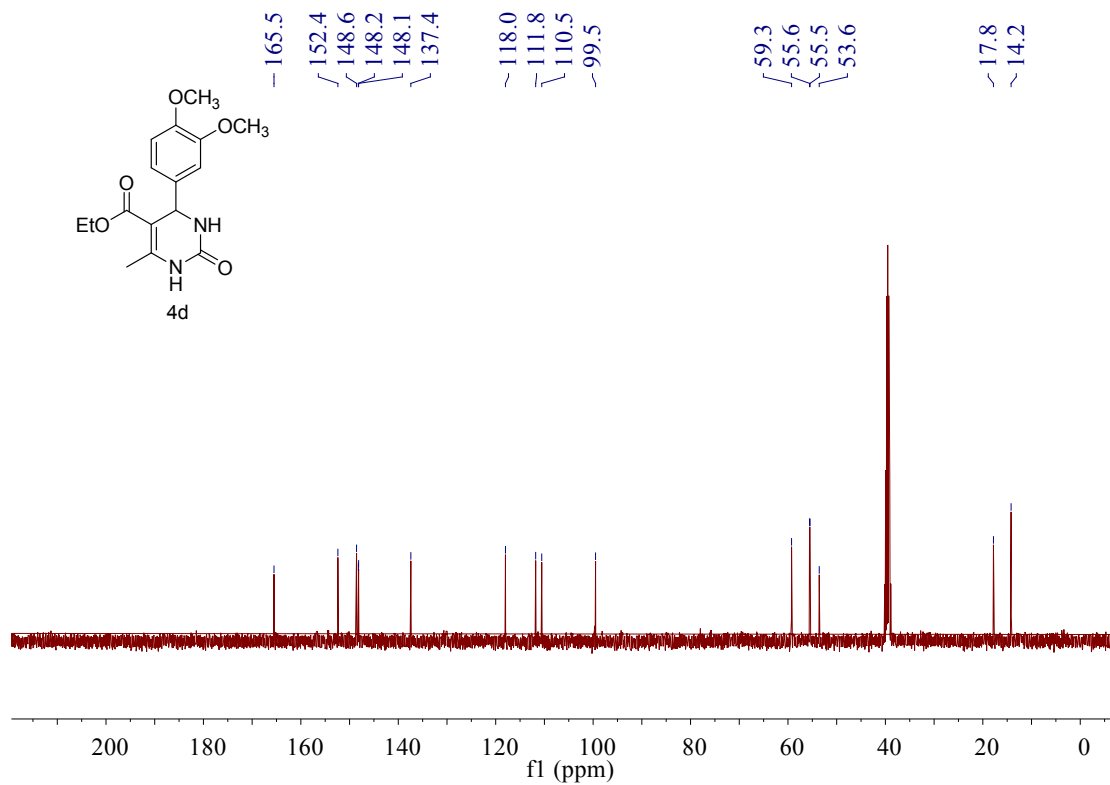

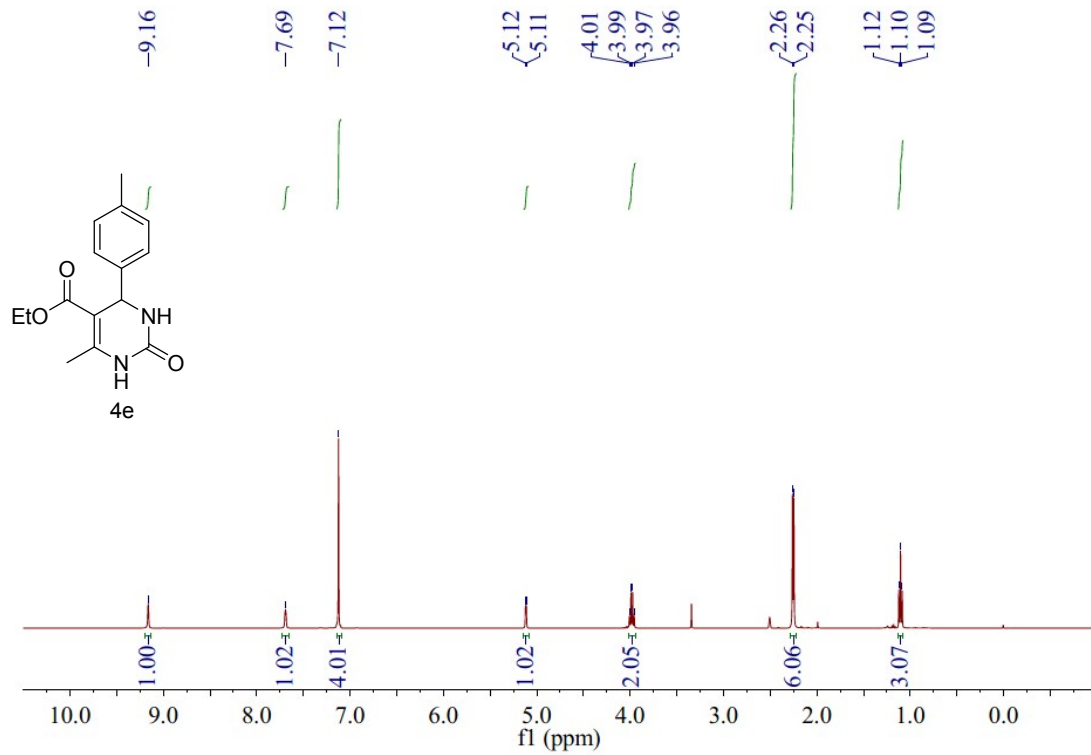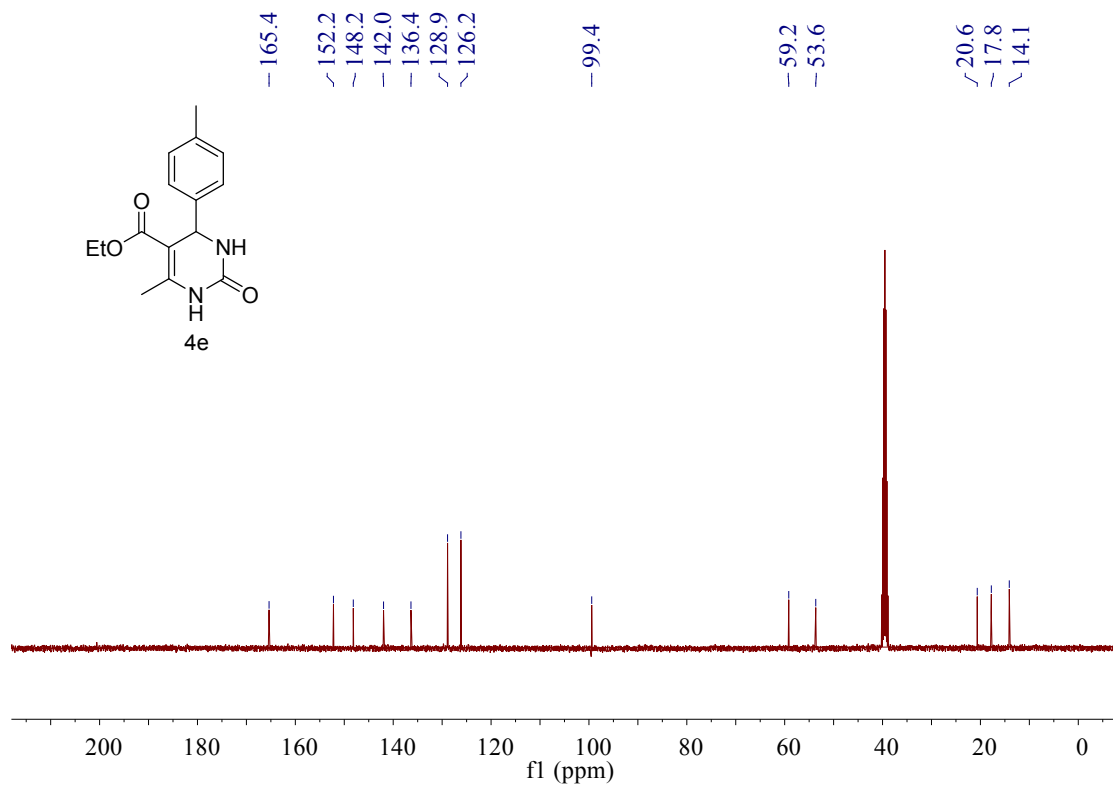

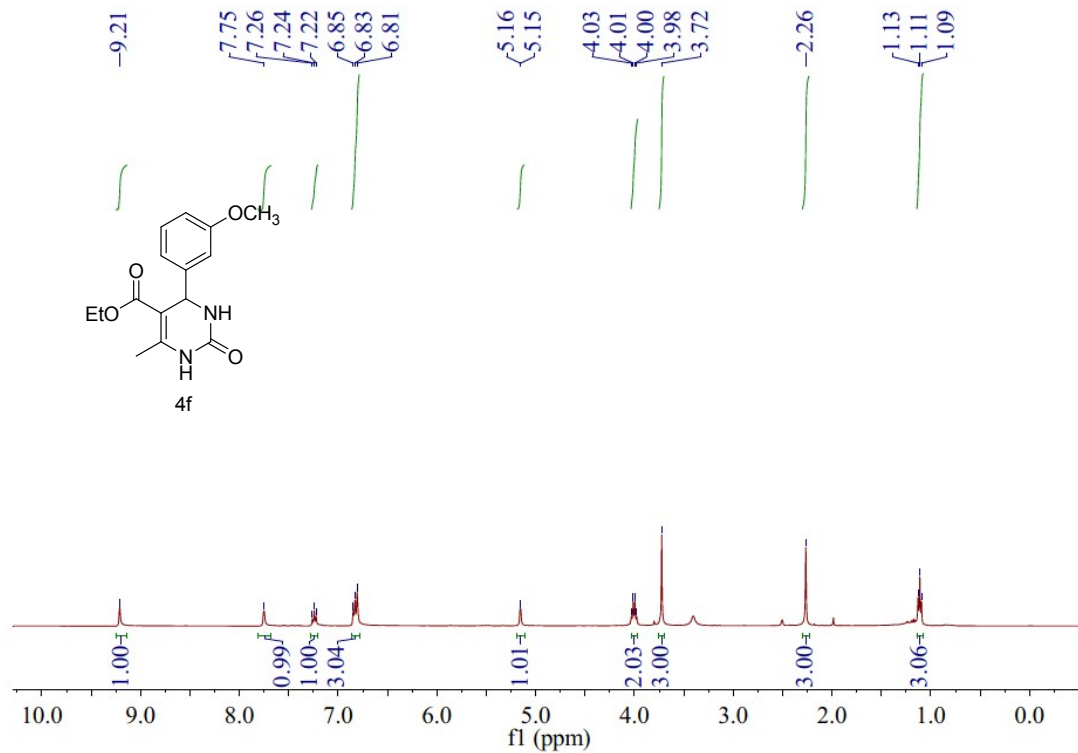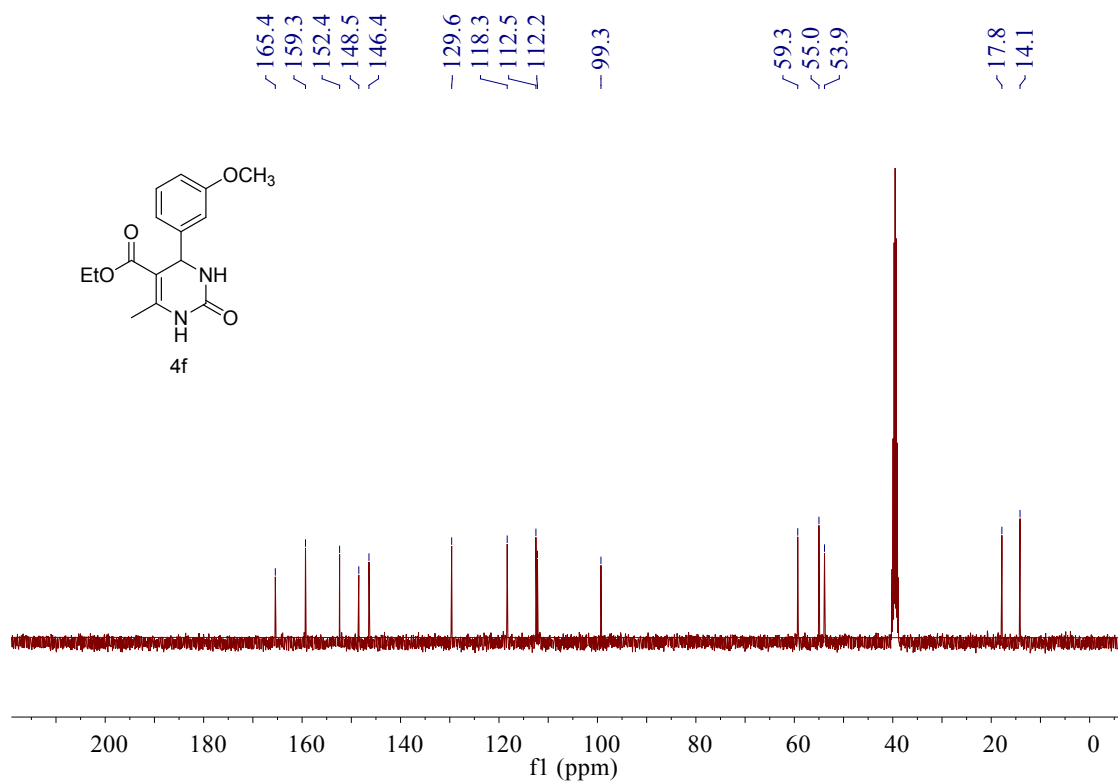

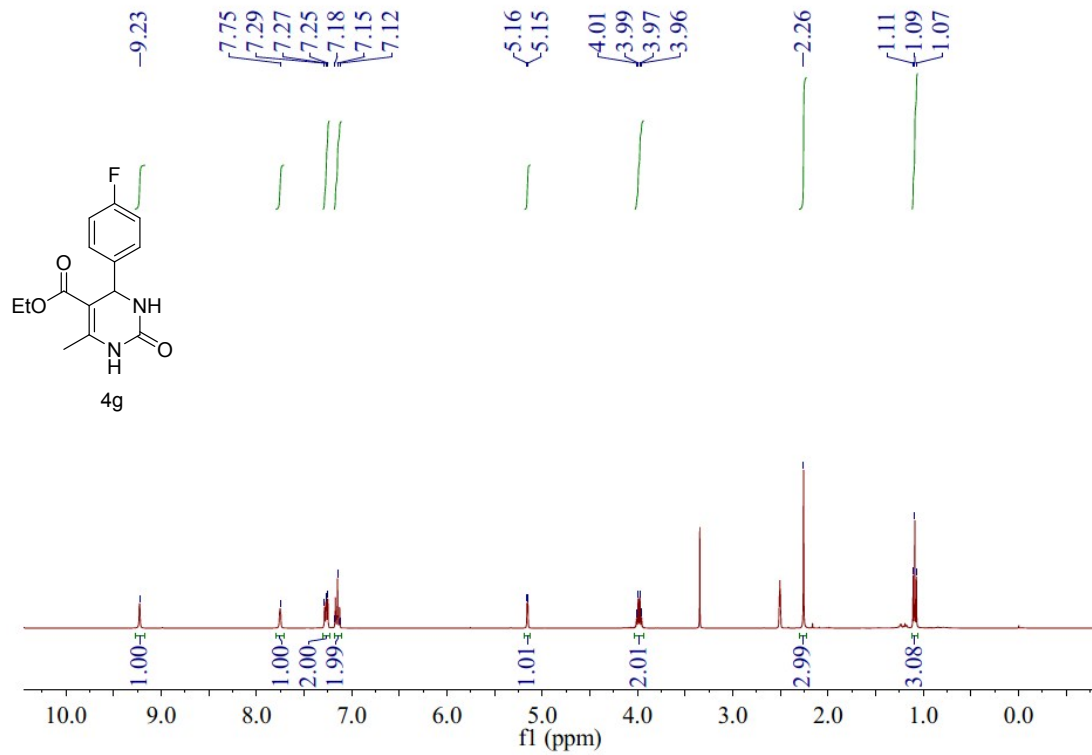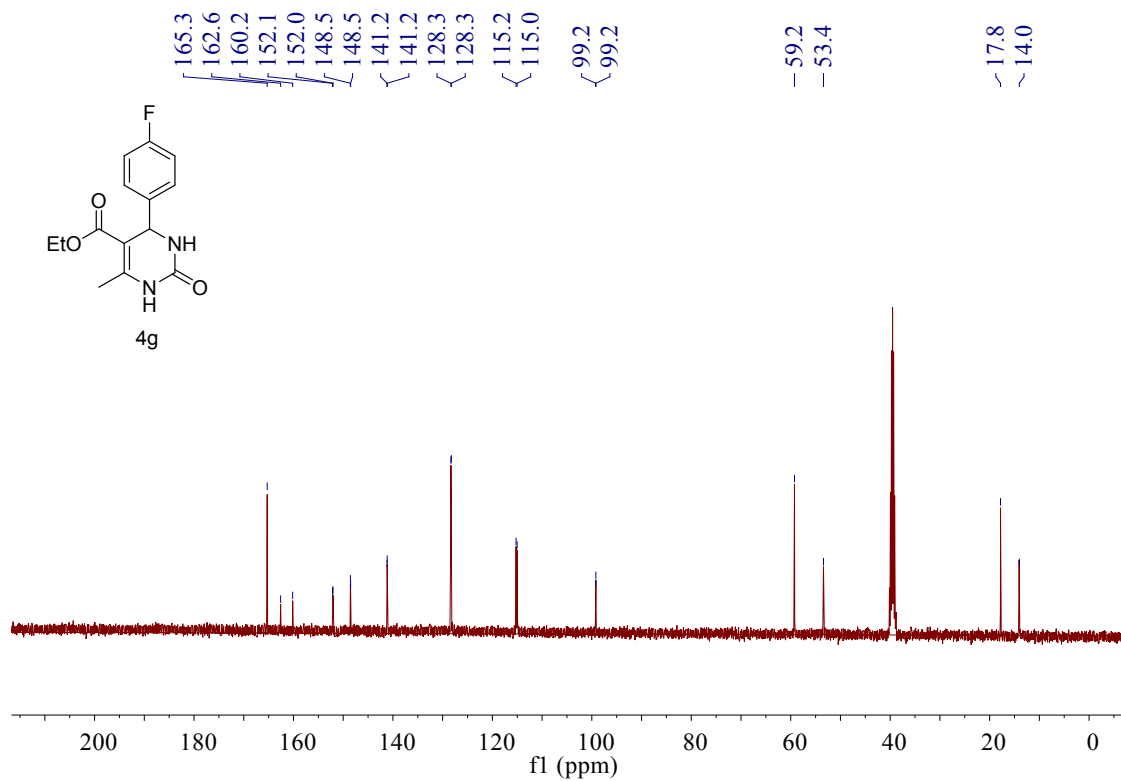

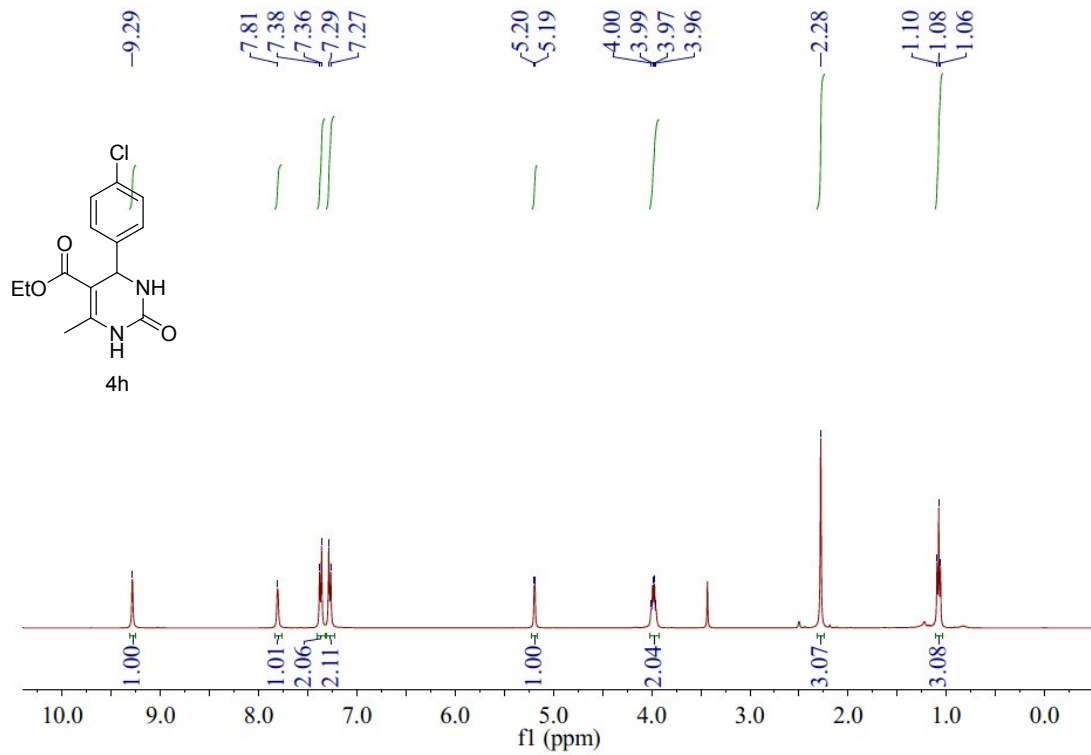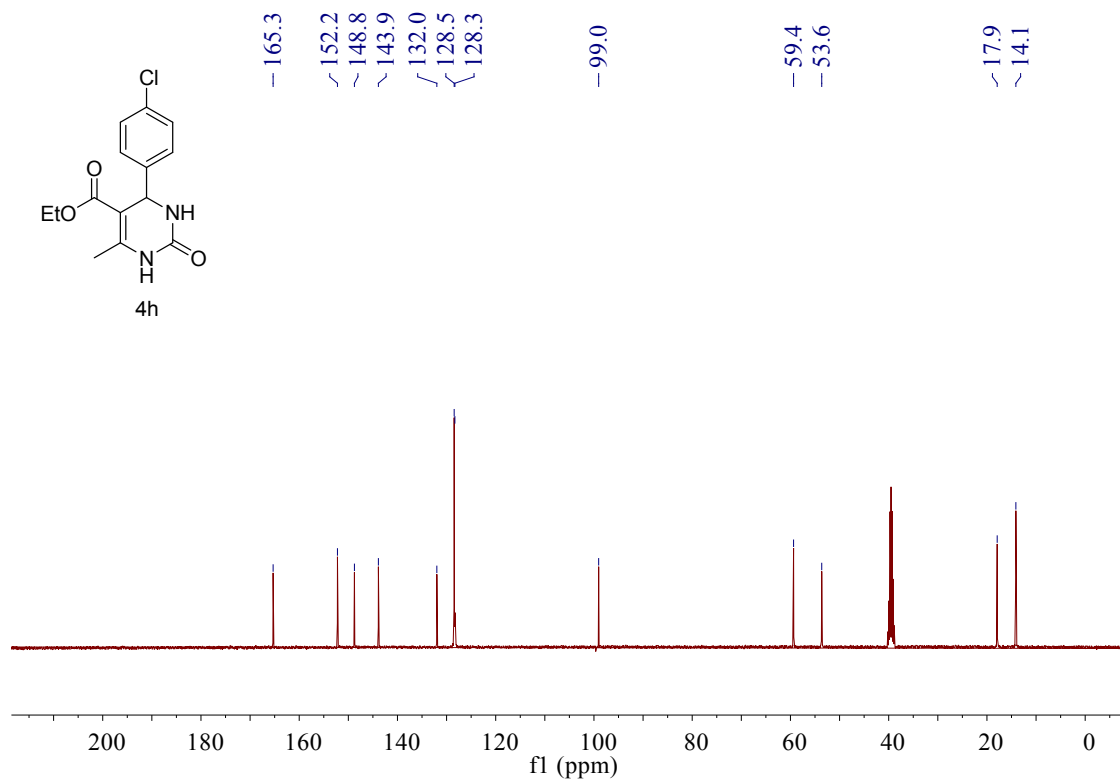



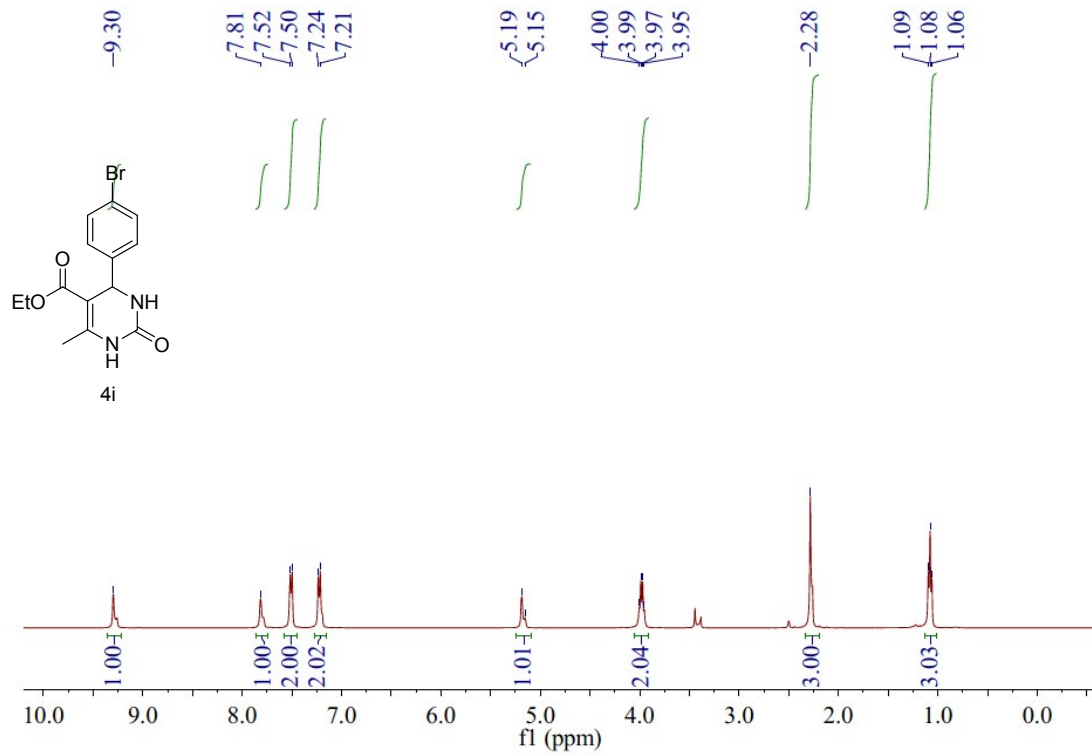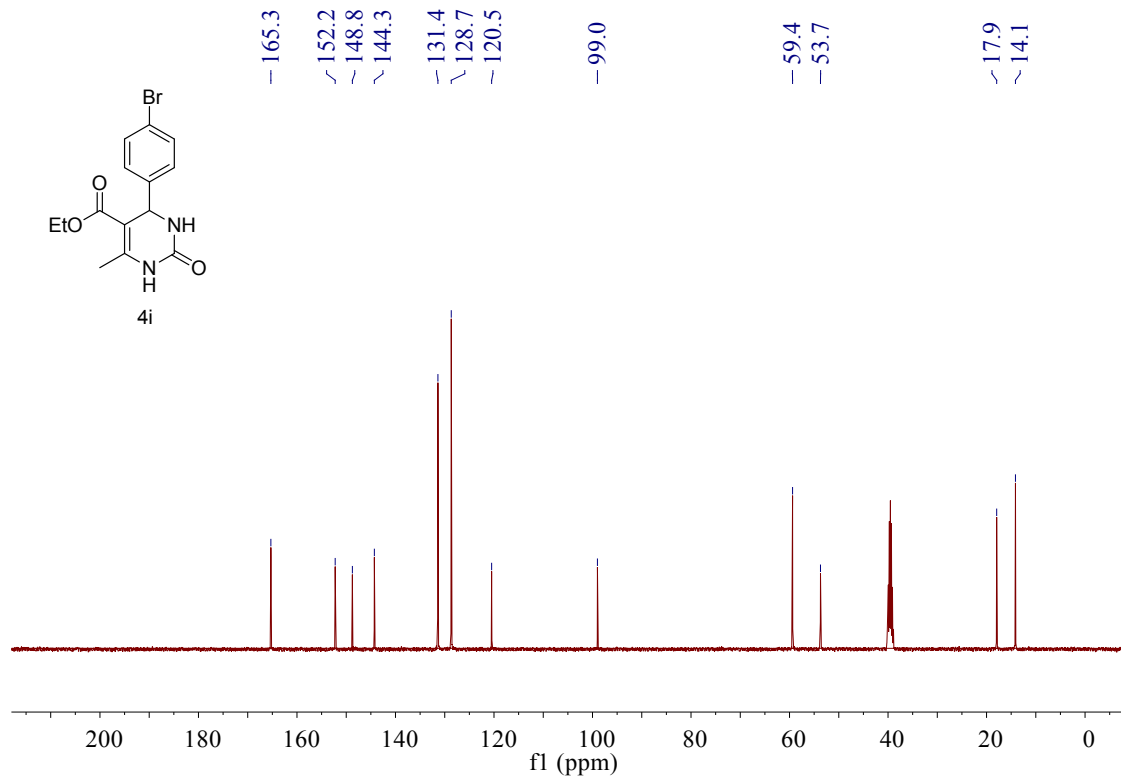

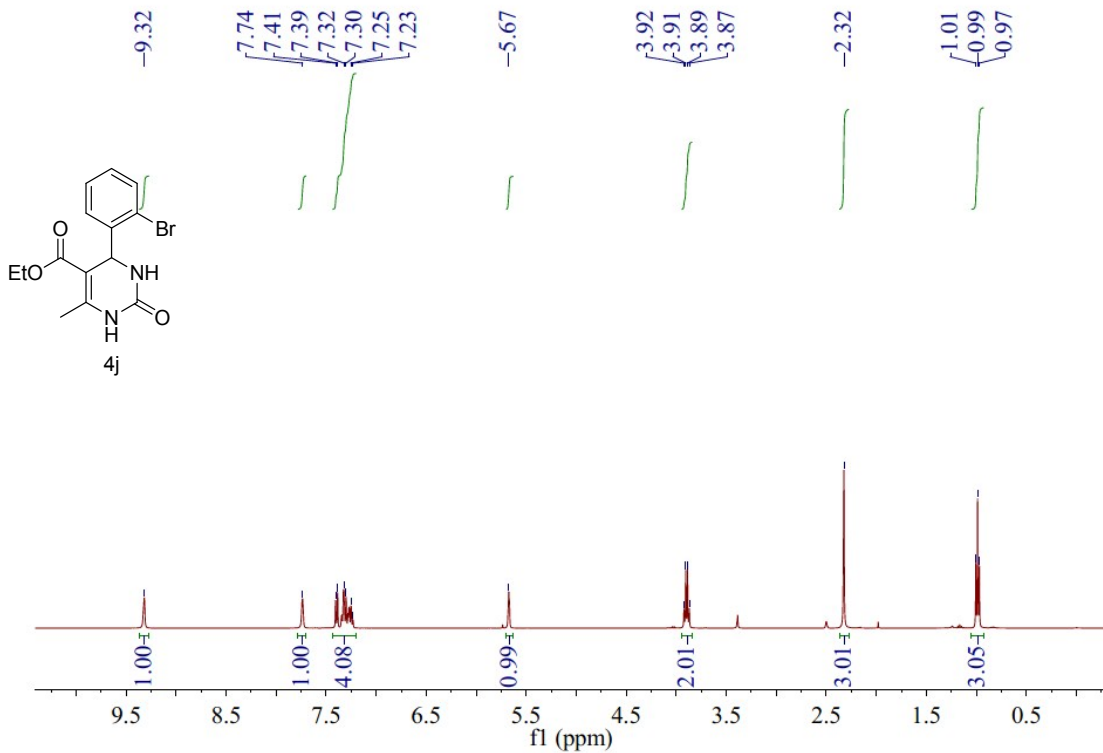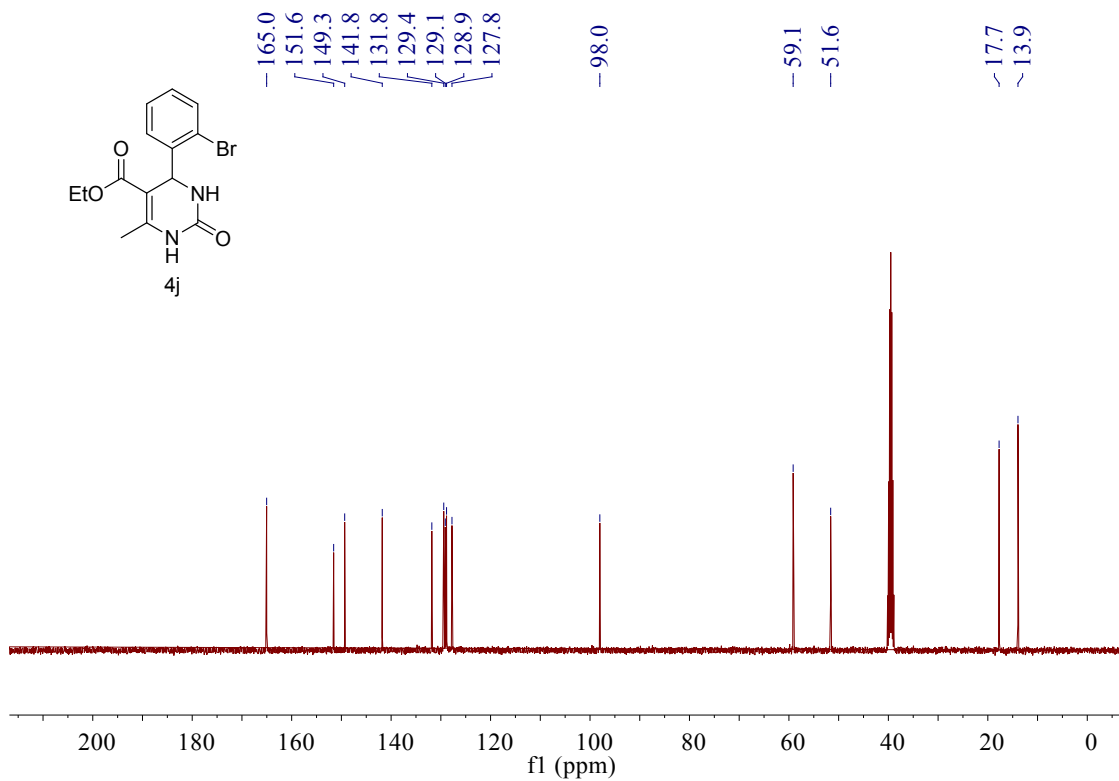

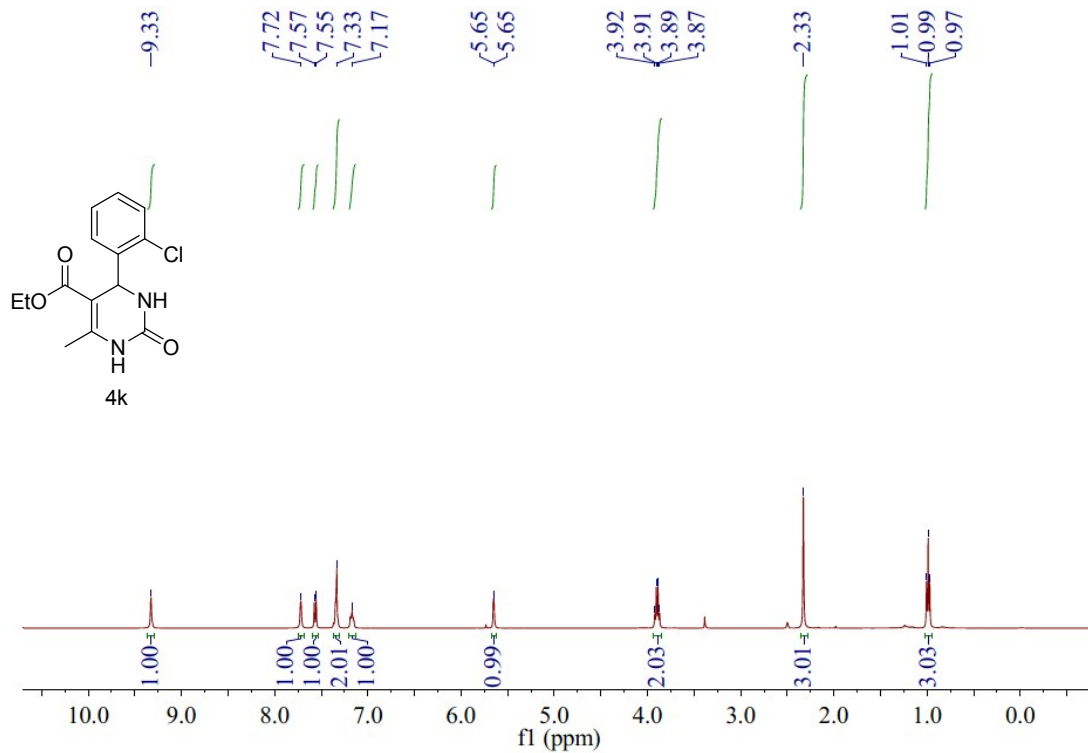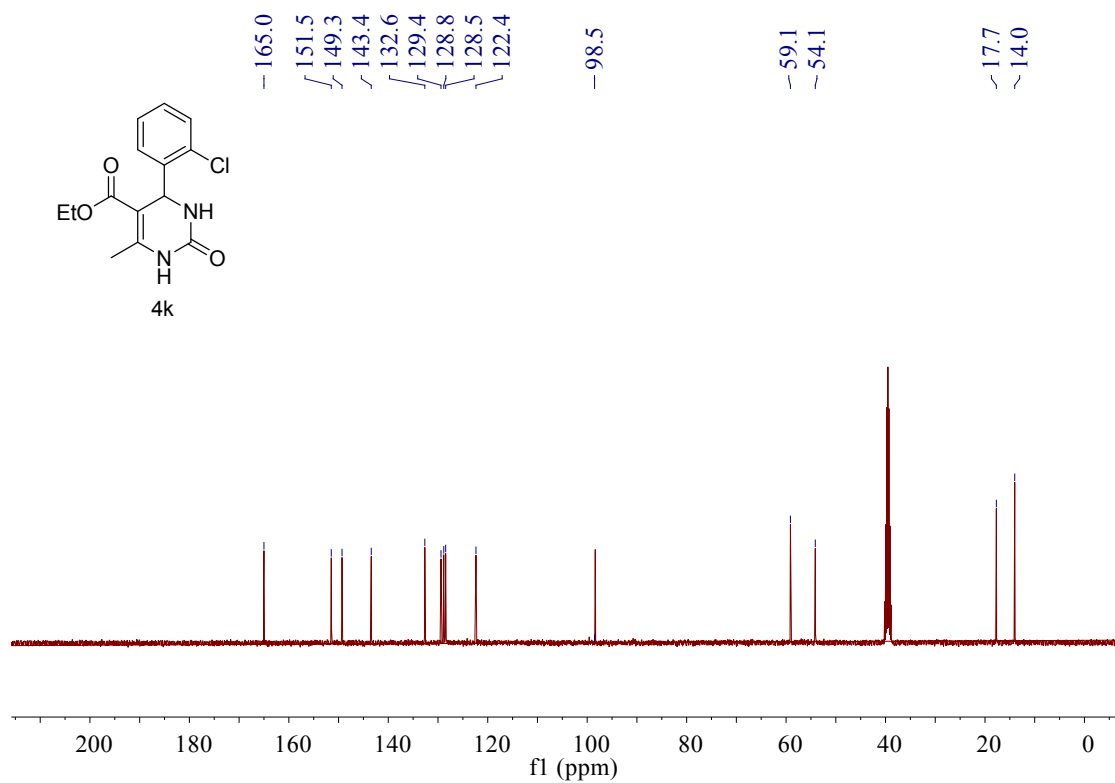

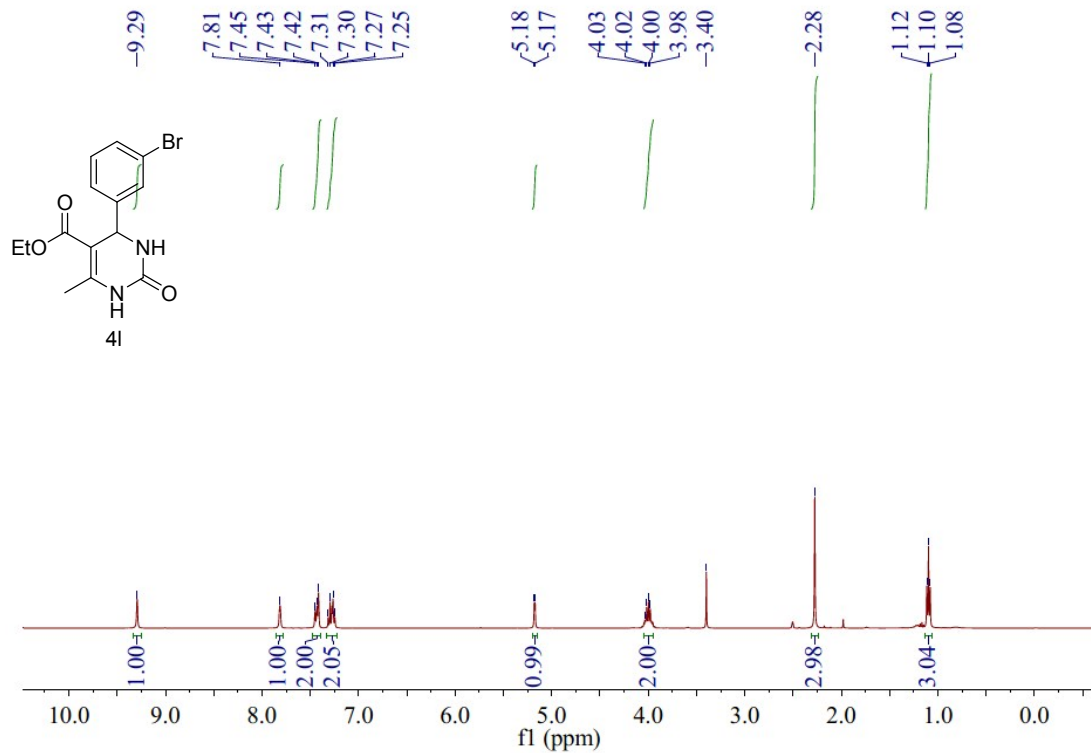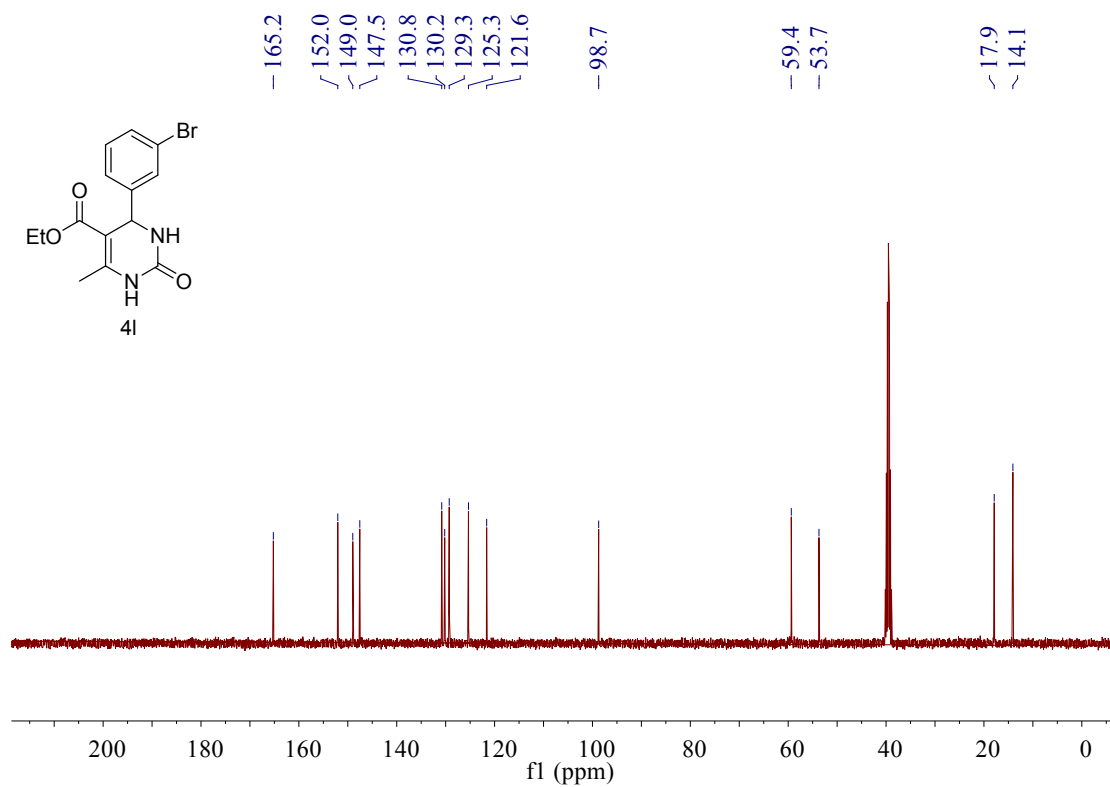

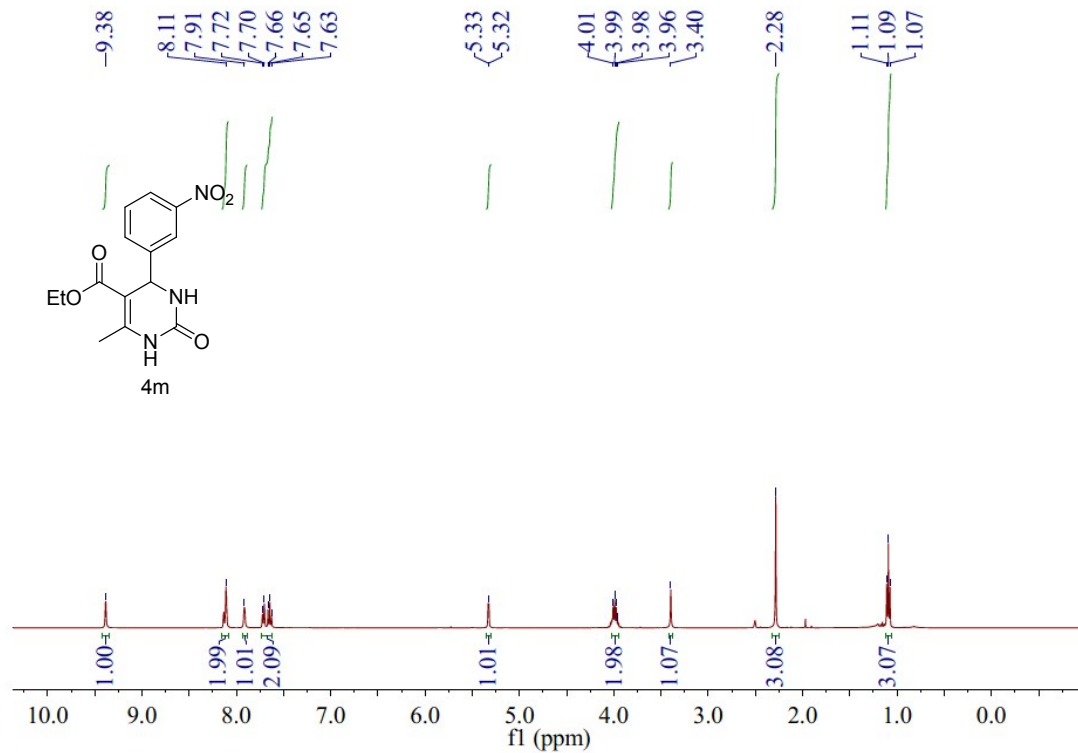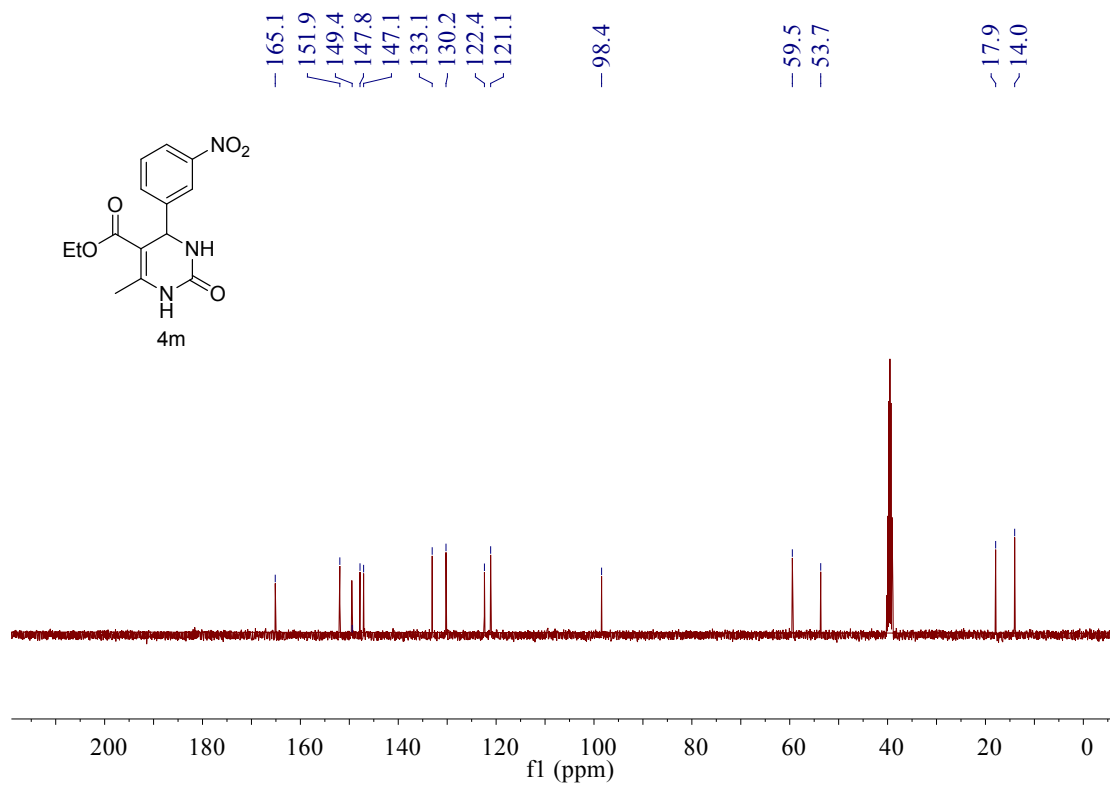

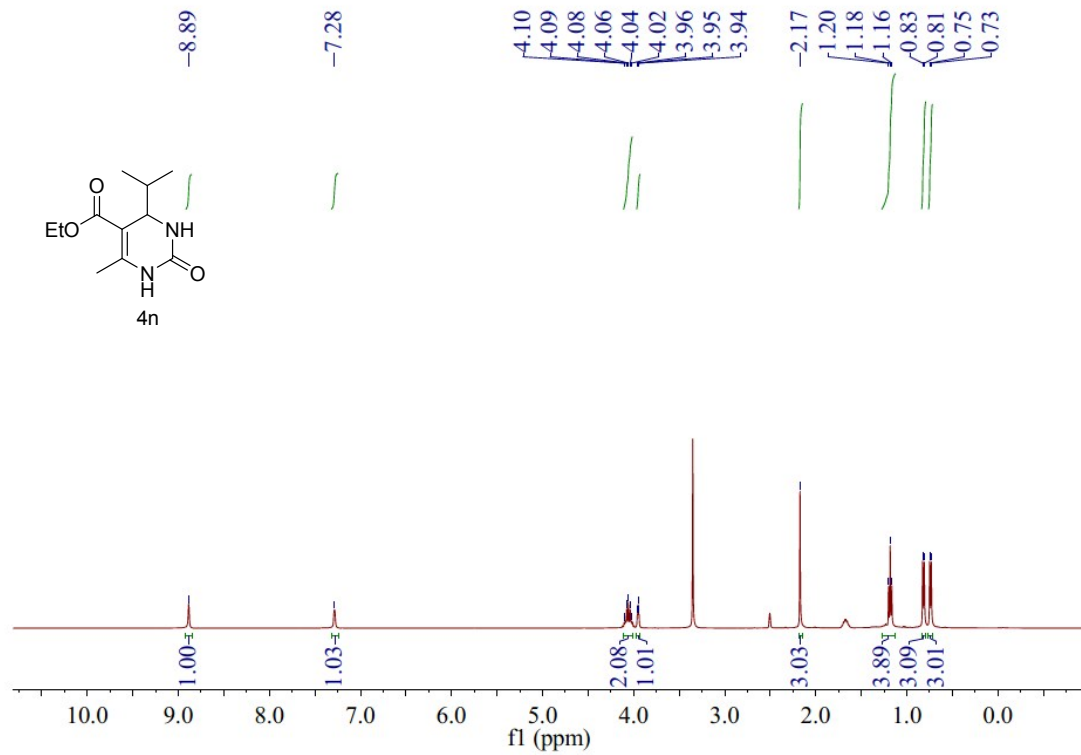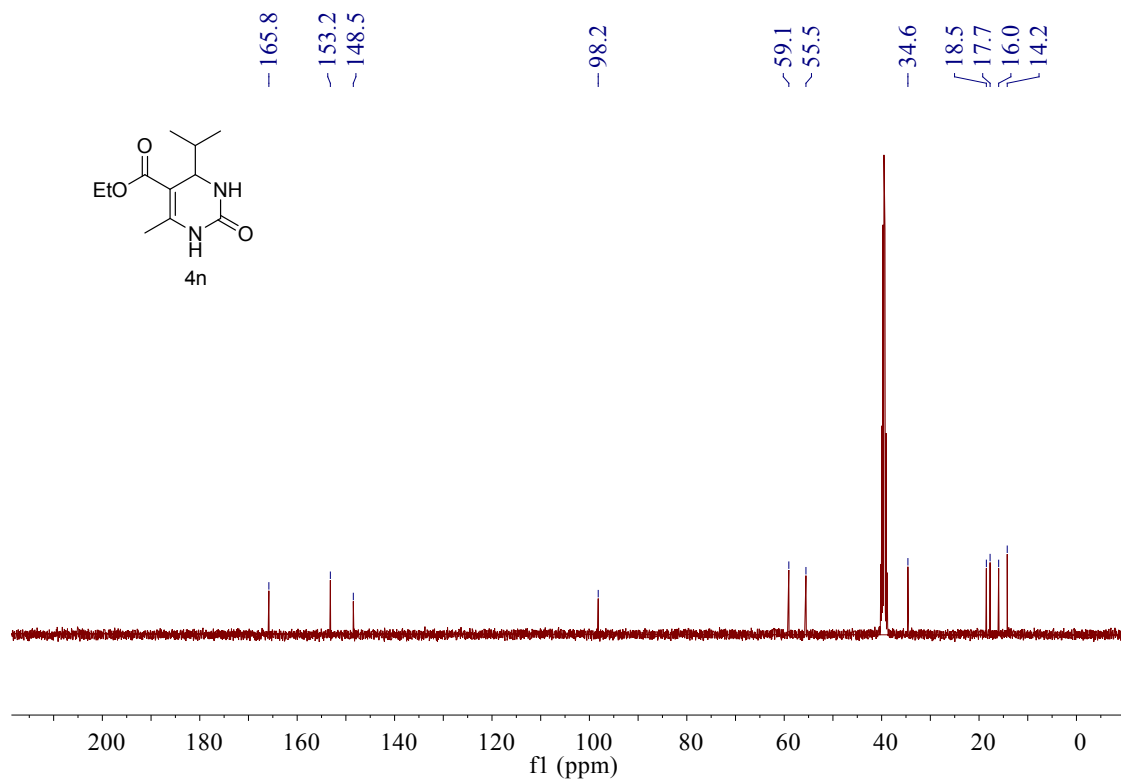

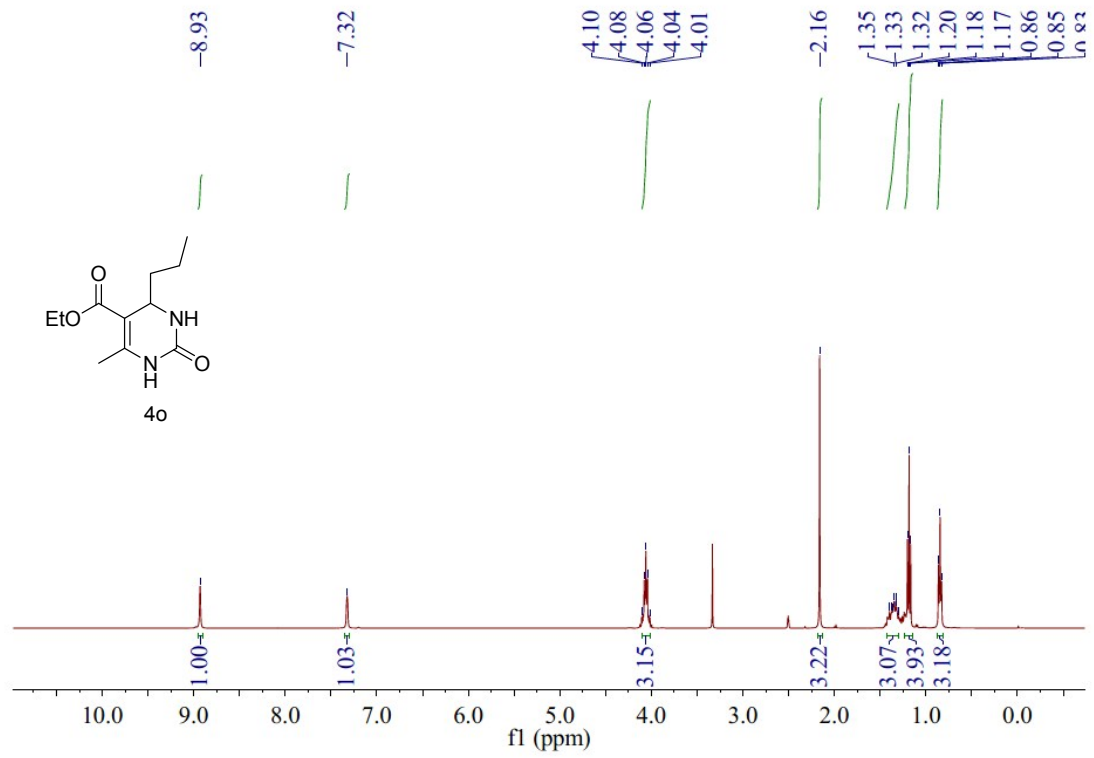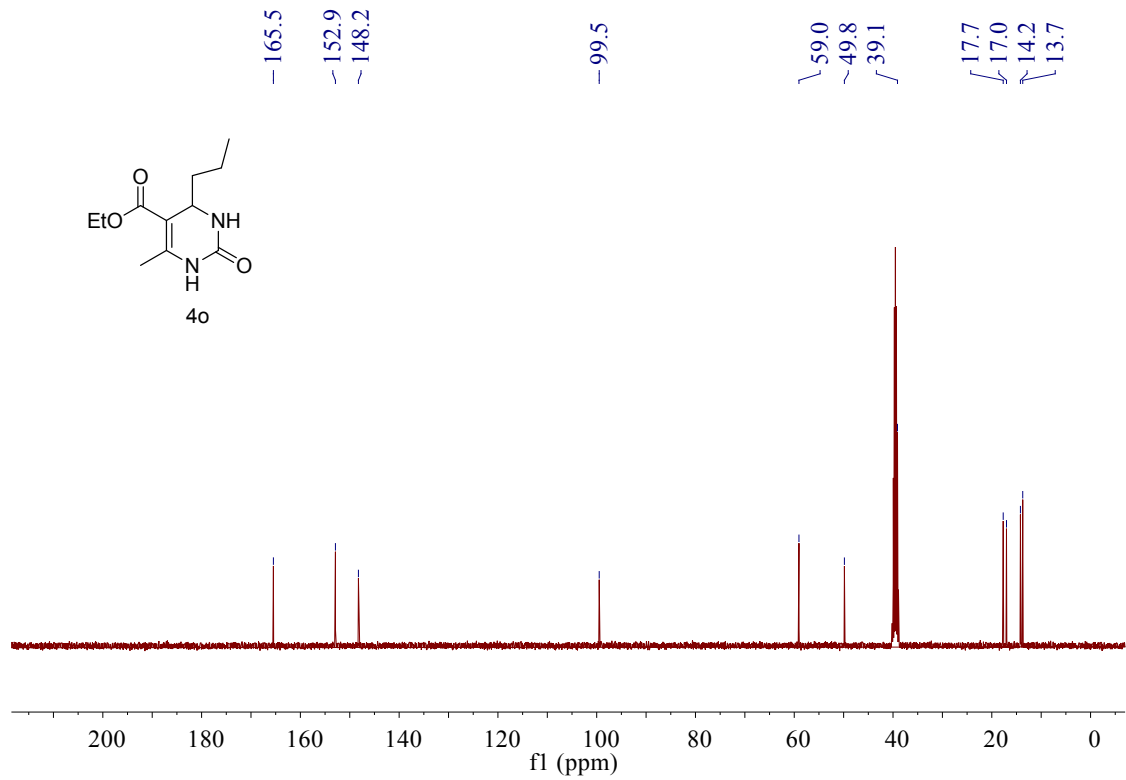

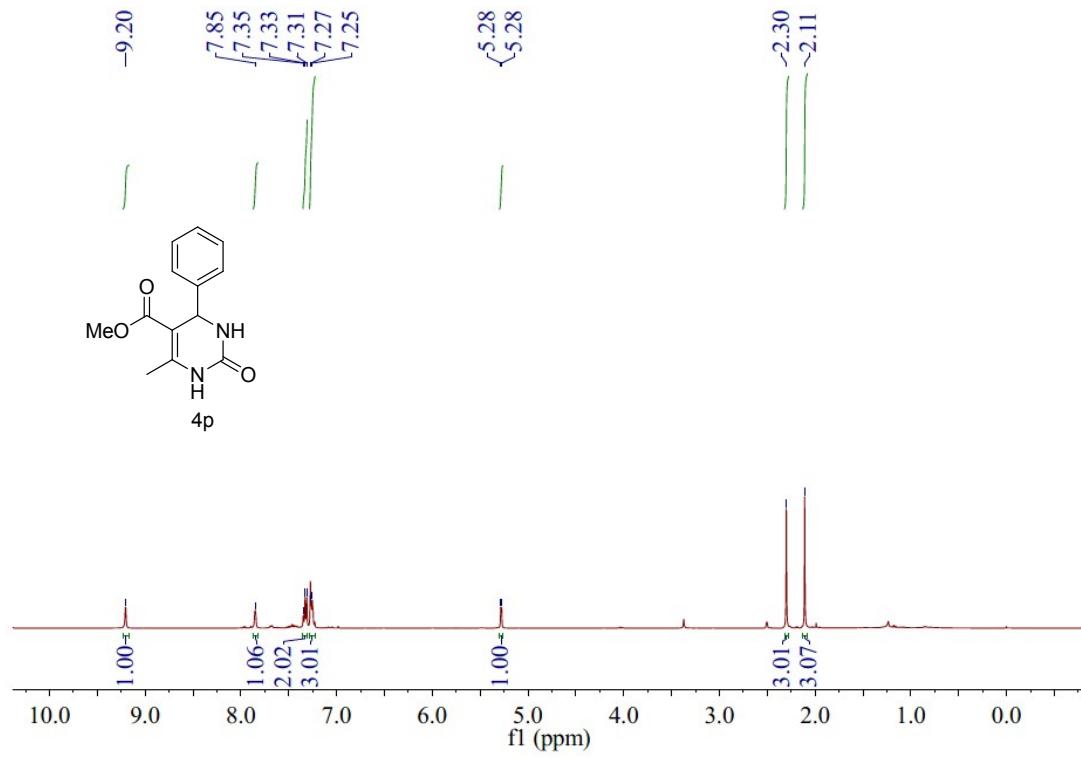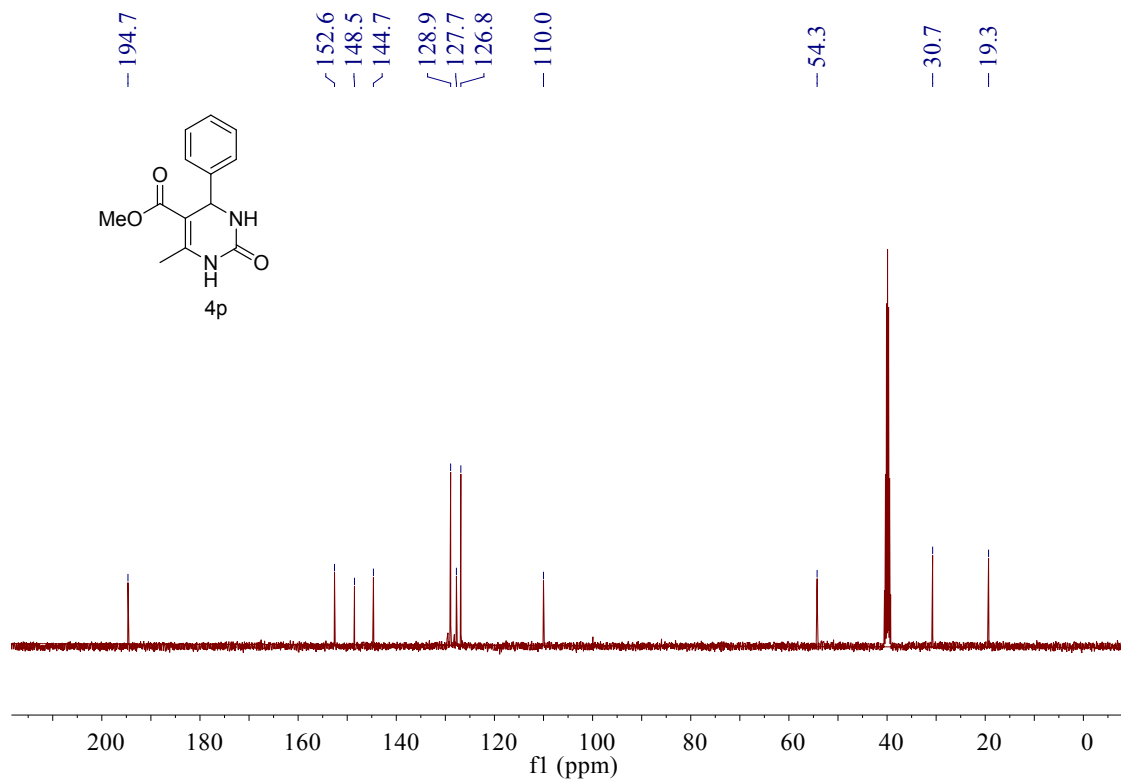



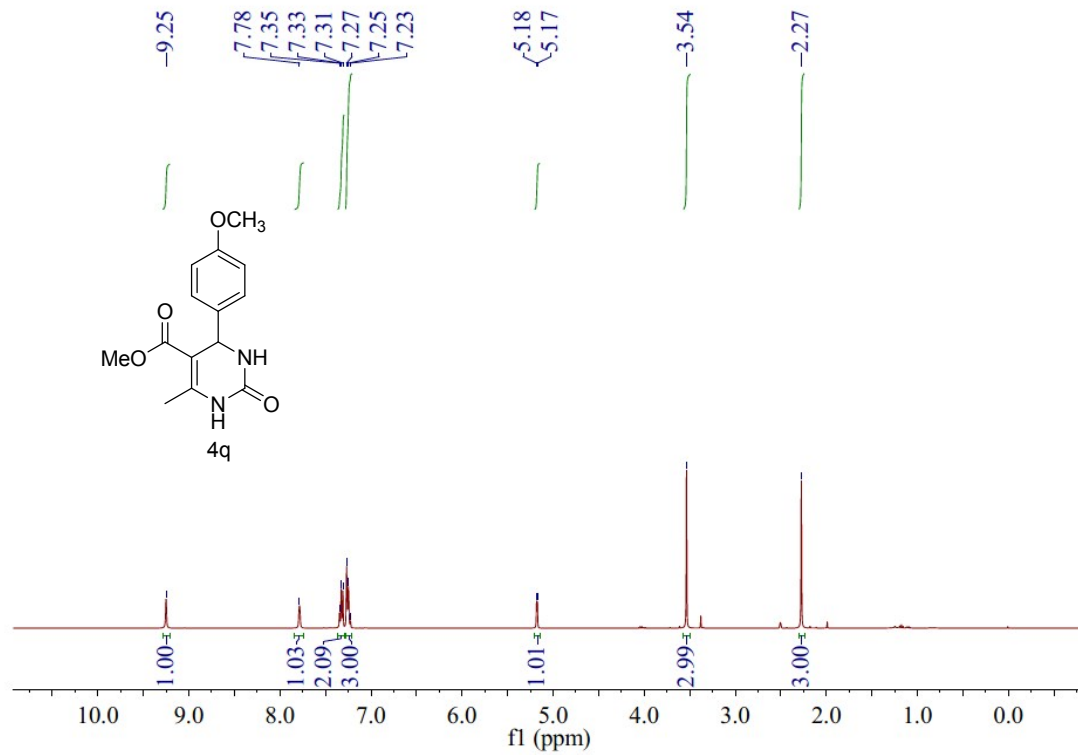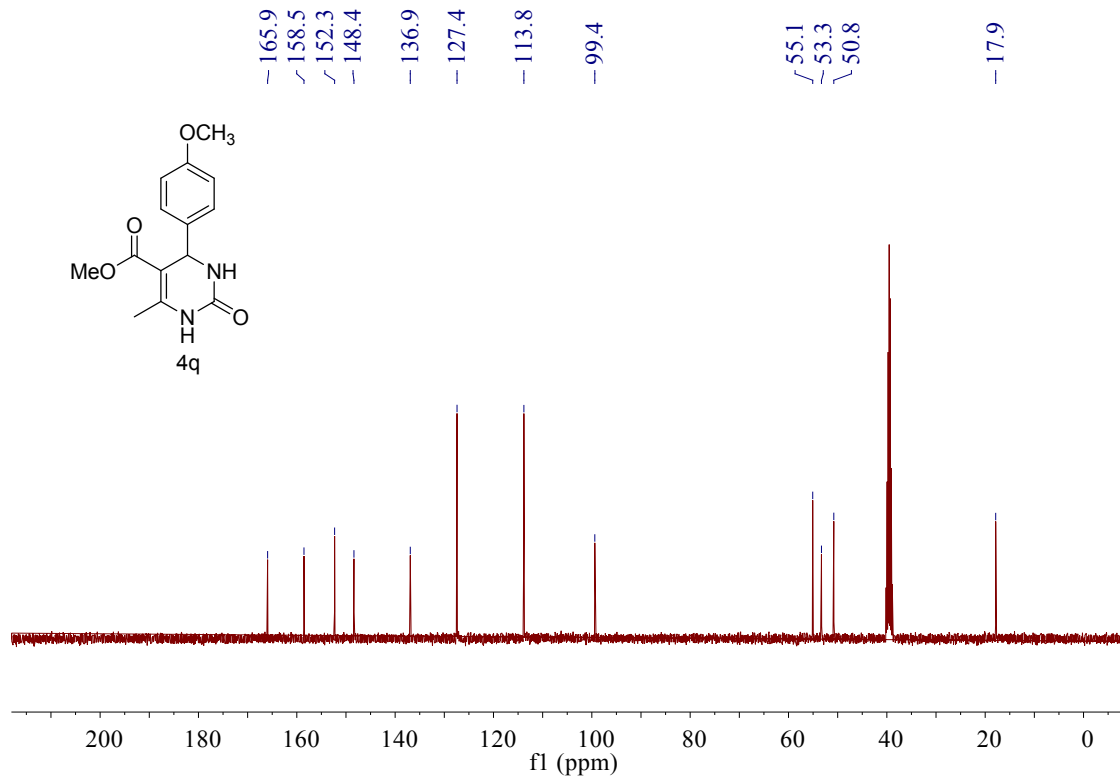

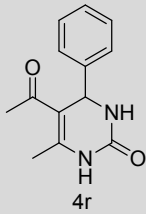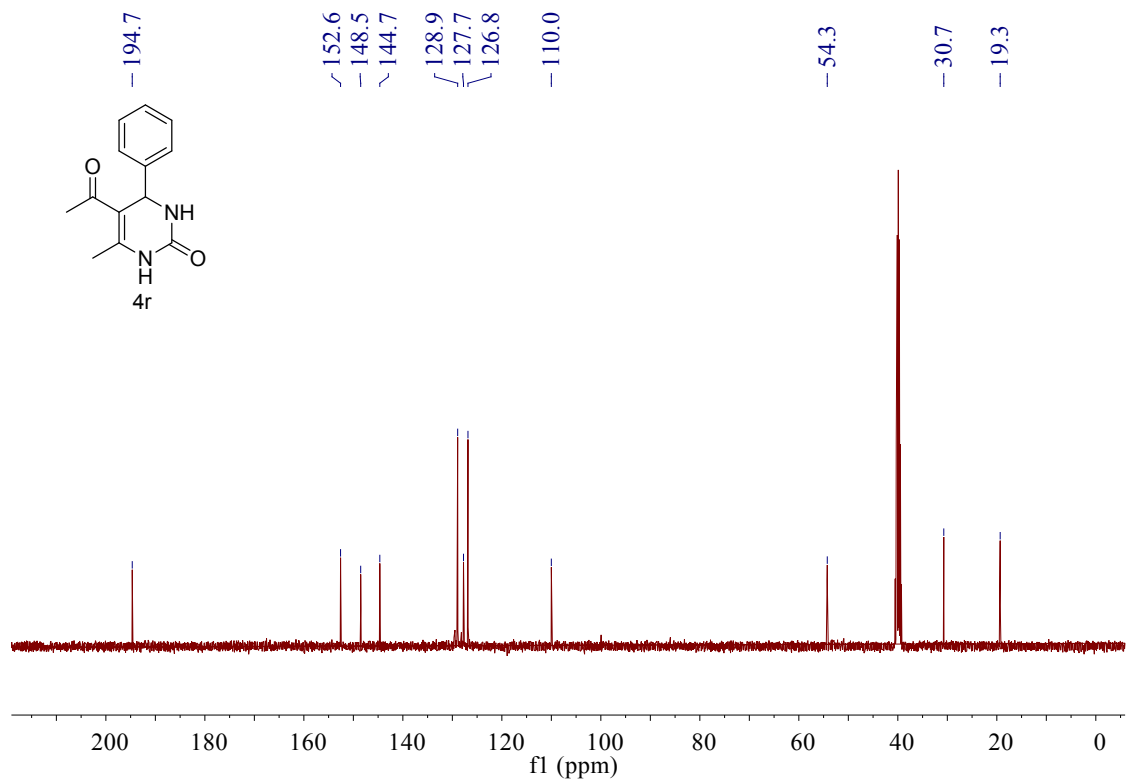

### 5. HR-ESI-MS studies for proposed mechanism.

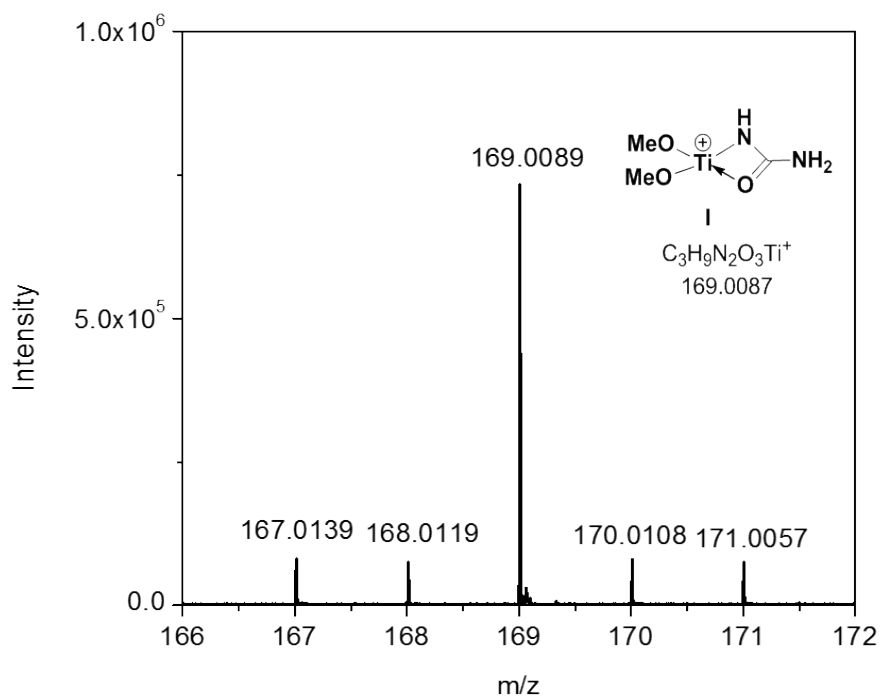

Figure S5-1. ESI(+)-MS spectra of intermediate I mode.

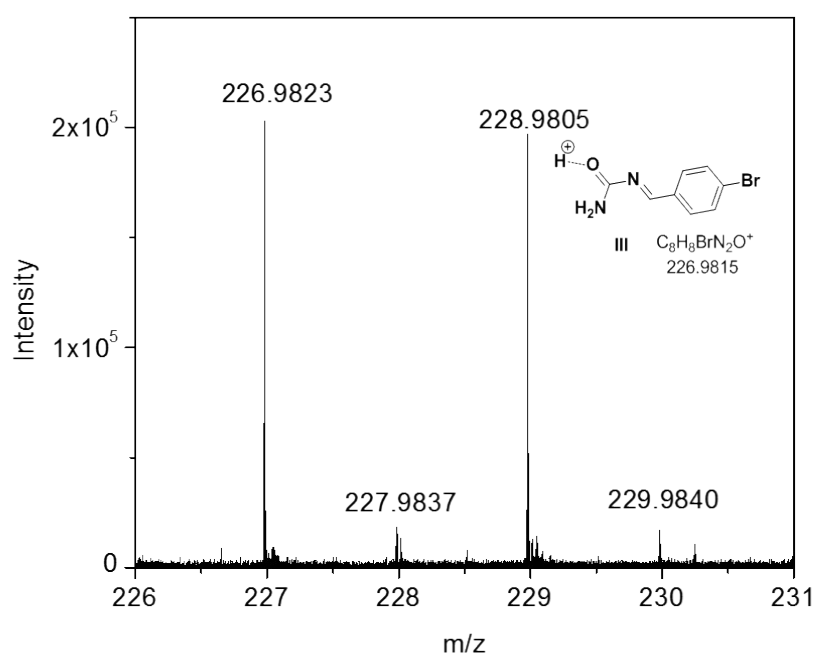

**Figure S5-2.** ESI(+)-MS spectra of intermediate III mode.

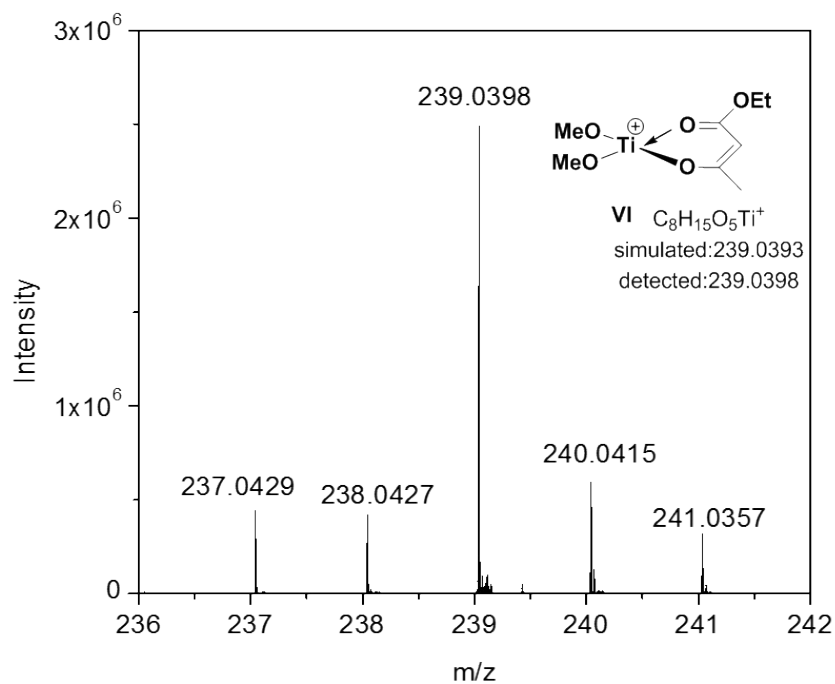

**Figure S5-3.** ESI(+)-MS spectra of intermediate VI mode.

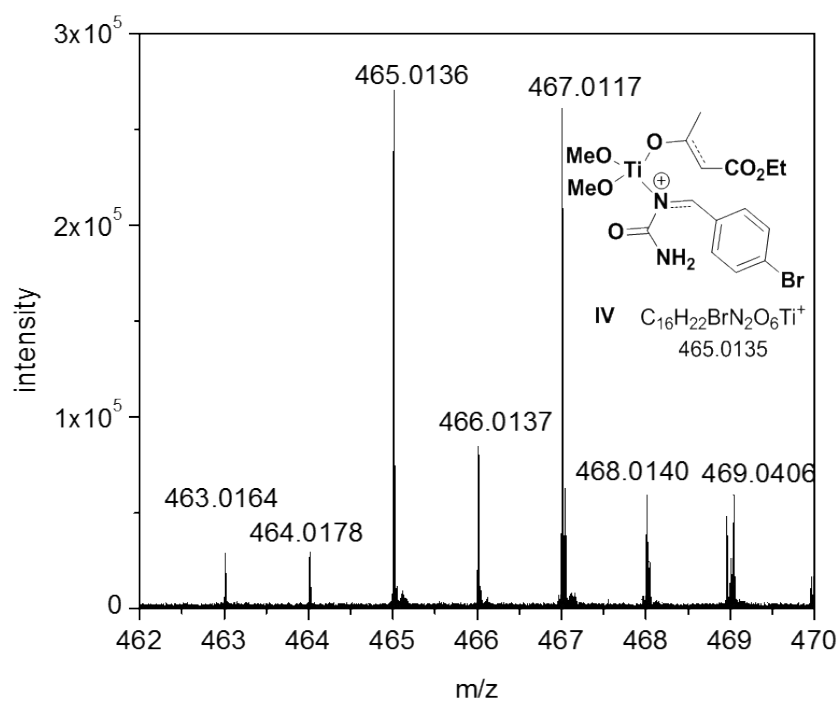

**Figure S5-4.** ESI(+)-MS spectra of intermediate IV mode.

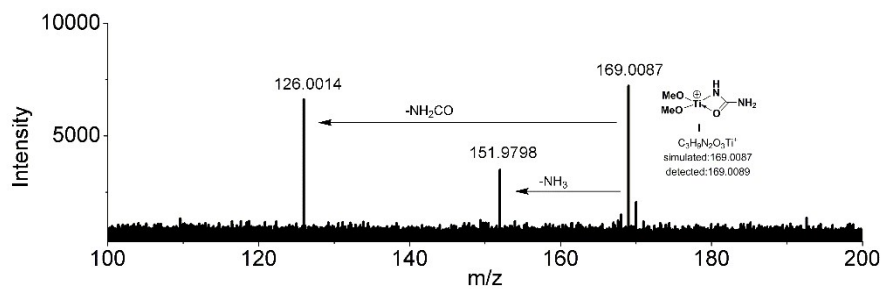

**Figure S5-5.** MS/MS spectrum and the fragment structures of intermediate I under positive ion mode.

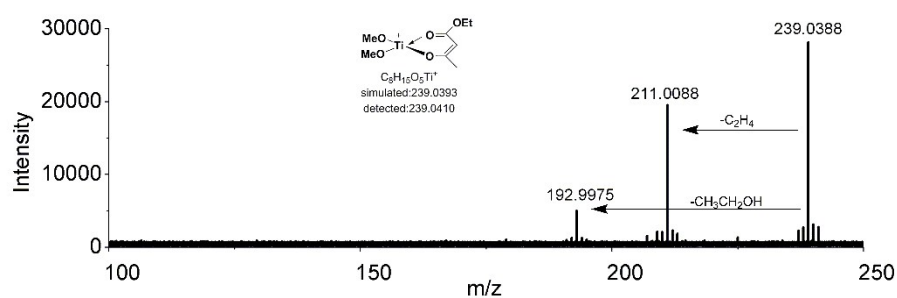

**Figure S5-6.** MS/MS spectrum and the fragment structures of intermediate VI under positive ion mode.

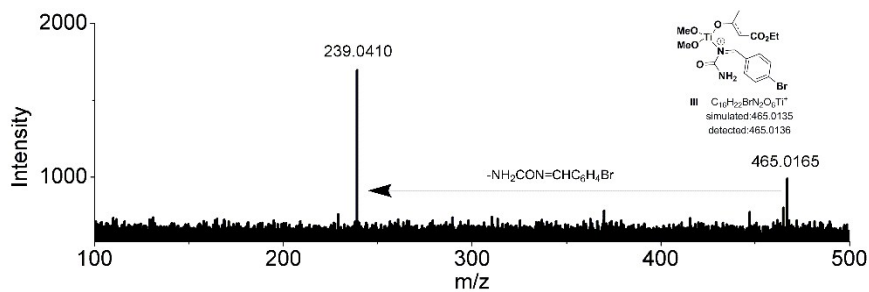

**Figure S5-7.** MS/MS spectrum and the fragment structures of intermediate III under positive ion mode.

## 6. $^{13}\text{C}$ NMR Spectra studies for proposed mechanism

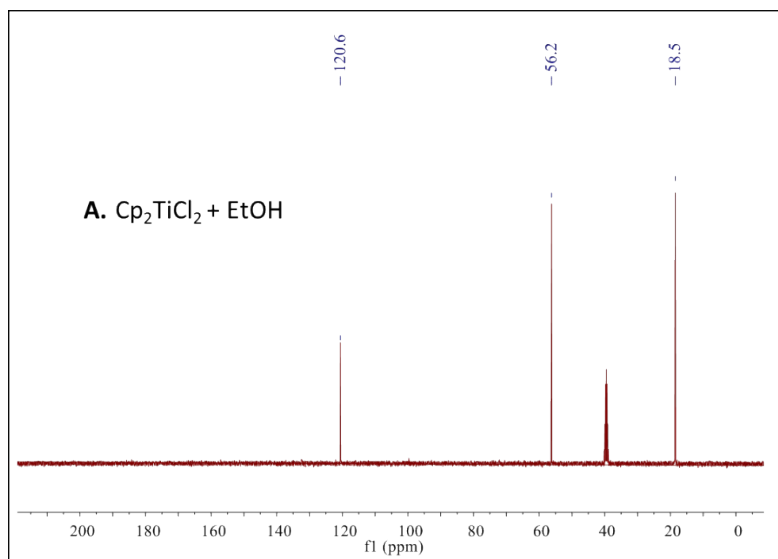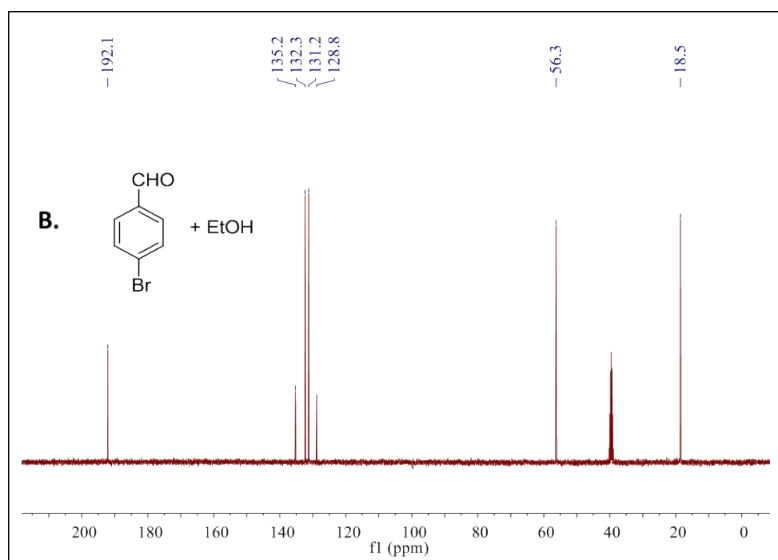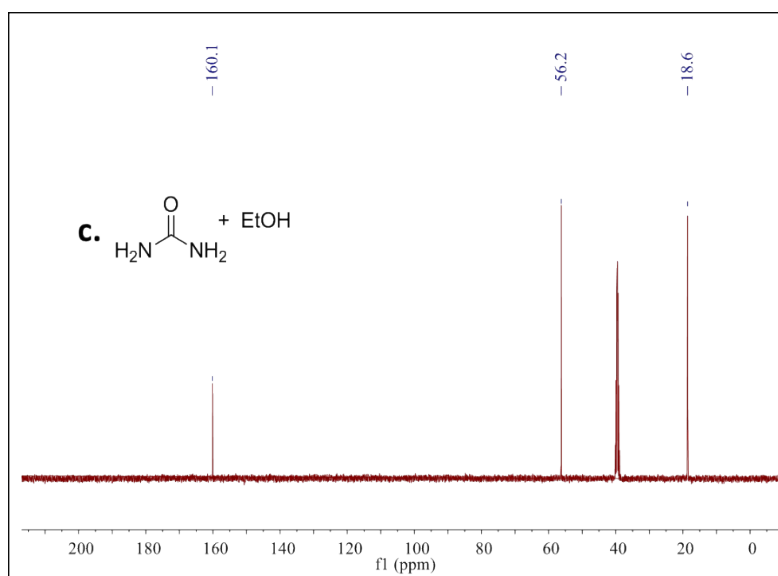

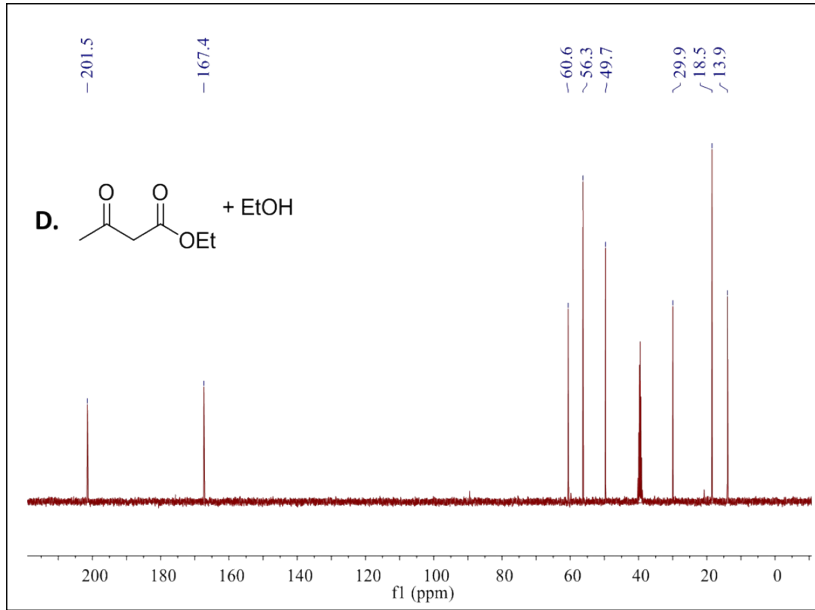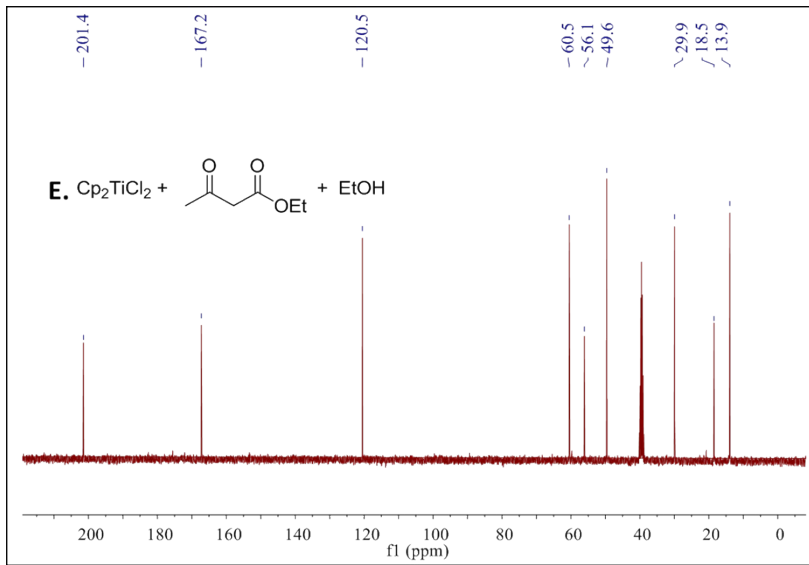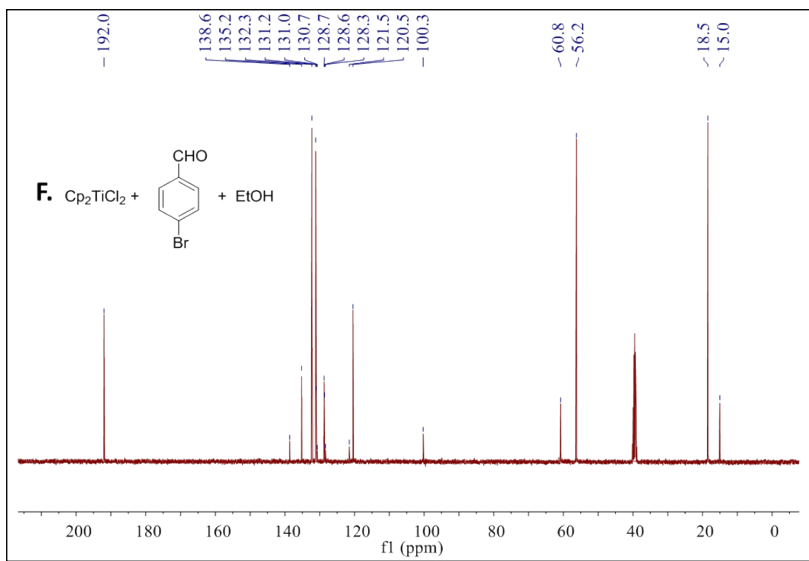

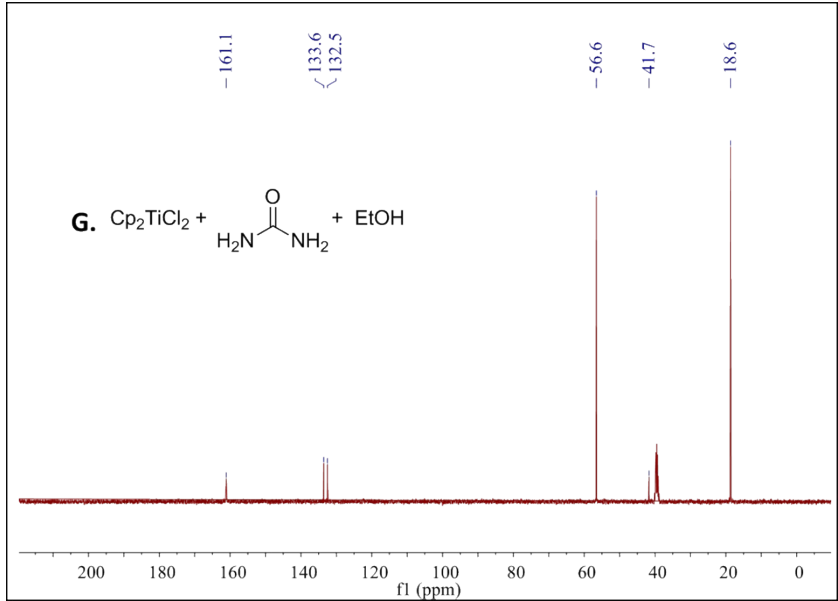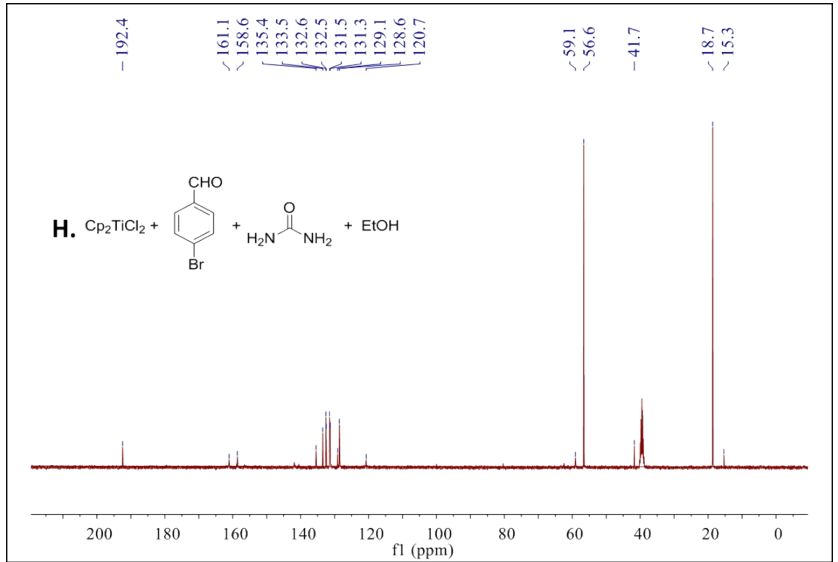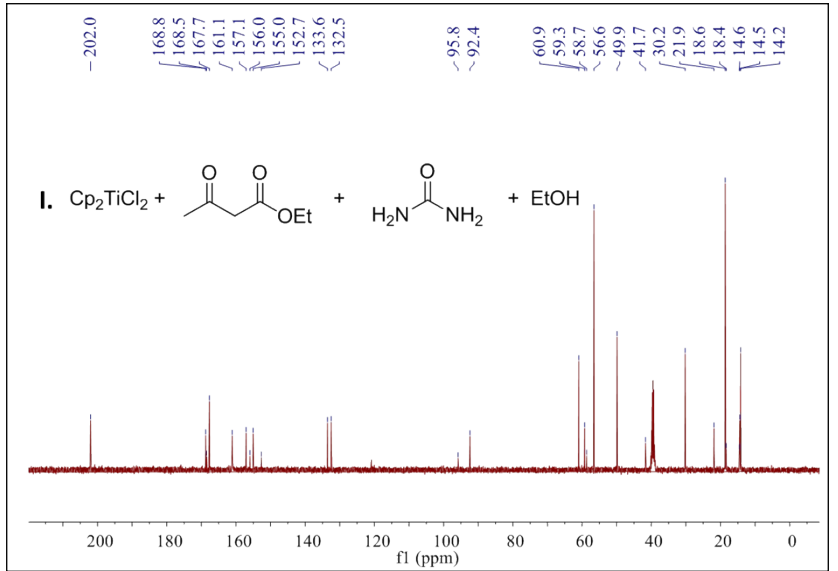

Supplement: c8ra01208c1.pdf [file c8ra01208c1.pdf]
